# Supplementary material for: Adverse events in patients in home healthcare: a retrospective record review using trigger tool methodology
Source: PubMed Central journal article supplement — BMJ Open. 2018 Jan 3;8(1):e019267. doi: 10.1136/bmjopen-2017-019267 (PMC5781156; doi:10.1136/bmjopen-2017-019267), 2018-01-03
Supplement: bmjopen-2017-019267.draft_revisions.pdf [file bmjopen-2017-019267.draft_revisions.pdf]

# BMJ Open

BMJ Open is committed to open peer review. As part of this commitment we make the peer review history of every article we publish publicly available.

When an article is published we post the peer reviewers' comments and the authors' responses online. We also post the versions of the paper that were used during peer review. These are the versions that the peer review comments apply to.

The versions of the paper that follow are the versions that were submitted during the peer review process. They are not the versions of record or the final published versions. They should not be cited or distributed as the published version of this manuscript.

BMJ Open is an open access journal and the full, final, typeset and author-corrected version of record of the manuscript is available on our site with no access controls, subscription charges or pay-per-view fees (<http://bmjopen.bmj.com>).

If you have any questions on BMJ Open's open peer review process please email [editorial.bmjopen@bmj.com](mailto:editorial.bmjopen@bmj.com)

# BMJ Open

## Adverse events in patients in home health care: a cohort study using trigger tool methodology

|                                 |                                                                                                                                                                                                                                                                                                                                                                                                                                                                                                                                                                                                                      |
|---------------------------------|----------------------------------------------------------------------------------------------------------------------------------------------------------------------------------------------------------------------------------------------------------------------------------------------------------------------------------------------------------------------------------------------------------------------------------------------------------------------------------------------------------------------------------------------------------------------------------------------------------------------|
| Journal:                        | <i>BMJ Open</i>                                                                                                                                                                                                                                                                                                                                                                                                                                                                                                                                                                                                      |
| Manuscript ID                   | bmjopen-2017-019267                                                                                                                                                                                                                                                                                                                                                                                                                                                                                                                                                                                                  |
| Article Type:                   | Research                                                                                                                                                                                                                                                                                                                                                                                                                                                                                                                                                                                                             |
| Date Submitted by the Author:   | 22-Aug-2017                                                                                                                                                                                                                                                                                                                                                                                                                                                                                                                                                                                                          |
| Complete List of Authors:       | Schildmeijer, Kristina; School of Health and Caring Sciences, Linnaeus University<br>Unbeck, Maria; Karolinska Institutet, Department of Clinical Sciences at Danderyd Hospital, Division of Orthopaedics<br>Ekstedt, Mirjam; Karolinska Institutet, LIME; Linneuniversitet<br>Lindblad, Marlène; Kungliga Tekniska Hogskolan, School of Technology and Health; Karolinska Institutet, LIME<br>Nilsson, Lena; Division of Drug Research, Anesthesiology and Intensive Care, Department of Medical and Health Sciences, Faculty of Health Sciences, Linköping University, Department of Anesthesia and Intensive Care |
| <b>Primary Subject Heading</b>: | Health services research                                                                                                                                                                                                                                                                                                                                                                                                                                                                                                                                                                                             |
| Secondary Subject Heading:      | Medical management                                                                                                                                                                                                                                                                                                                                                                                                                                                                                                                                                                                                   |
| Keywords:                       | Quality in health care < HEALTH SERVICES ADMINISTRATION & MANAGEMENT, Health & safety < HEALTH SERVICES ADMINISTRATION & MANAGEMENT, Home health care, Patient safety, Trigger Tool, Patient harm                                                                                                                                                                                                                                                                                                                                                                                                                    |
|                                 |                                                                                                                                                                                                                                                                                                                                                                                                                                                                                                                                                                                                                      |

SCHOLARONE™  
Manuscripts

1  
2  
3 Adverse events in patients in home health care: a cohort study  
4  
5  
6  
7 using trigger tool methodology  
8  
9

10 Kristina Schildmeijer,<sup>1</sup> Maria Unbeck,<sup>2,3</sup> Mirjam Ekstedt,<sup>1,4</sup> Marlene Lindblad,<sup>5,6</sup>  
11  
12 Lena Nilsson<sup>7</sup>  
13

14  
15  
16 <sup>1</sup>Department of Health and Caring Sciences, Linnaeus University, Kalmar, Sweden  
17

18  
19 <sup>2</sup>Department of Orthopaedics, Danderyd Hospital, Stockholm, Sweden  
20

21  
22 <sup>3</sup>Department of Clinical Sciences, Danderyd Hospital, Karolinska Institutet, Stockholm,  
23  
24 Sweden  
25

26  
27 <sup>4</sup>Department of Learning, Informatics, Management and Ethics, Karolinska Institutet,  
28  
29 Stockholm, Sweden  
30

31  
32 <sup>5</sup>Royal Institute of Technology, School of Technology and Health, Stockholm, Sweden  
33

34  
35 <sup>6</sup>Department of Health Care Sciences, Ersta Sköndal University College, Stockholm,  
36  
37 Sweden  
38

39  
40 <sup>7</sup>Department of Anaesthesiology and Intensive Care, Department of Medical and Health  
41  
42 Sciences, Linköping University, Linköping, Sweden  
43

44 \*Correspondence to: Kristina Schildmeijer; [kristina.schildmeijer@lnu.se](mailto:kristina.schildmeijer@lnu.se)  
45

46 Word count: 3953  
47  
48  
49  
50  
51  
52  
53  
54  
55  
56  
57  
58  
59  
60

## ABSTRACT

**Objective:** Home health care is increasingly becoming a part of health care. The patients are often aged, frail and have multiple diseases, and multiple caregivers are involved in their treatment and care. This study explores the origin, incidence, pattern and preventability of the adverse events (AEs) that occur in patients admitted to receiving home health care.

**Design:** A cohort study using retrospective record review and trigger tool methodology.

**Setting and methods:** Ten teams experienced in home health care from nine regions across Sweden reviewed home health care records in a two-stage procedure using 38 predefined triggers in four modules. A random sample of 600 patients 18 years or older receiving home health care during 2015 was reviewed.

**Primary and secondary outcome measures:** The primary outcome measure was the cumulative incidence of AEs found in patients receiving home health care; secondary measures were origin, type, severity of harm and preventability of the AEs.

**Results:** The patients were aged 20–79 years old; 280 men and 320 women. The review teams identified 356 AEs in 226 (37.7%) of the home health care record. Of these, 255 (71.6%) were assessed as being preventable. Most (246, 69.1%) required extra health care visits or led to a prolonged period of health care. Most of the AEs (271, 76.1%) originated in home health care; the rest were detected during home health care but were related to care outside home health care. The most common AEs were health care-associated infections, falls and pressure ulcers.

**Conclusions:** AEs in patients receiving home health care are common, mostly preventable and often cause temporary harm requiring extra health care resources. The types of AEs that occur or are detected in home health care settings imply that we must address and improve how care is provided. This is an important area for future studies.

**Keywords:** Home health care, Patients, Adverse events, Patient harm, Patient safety, Trigger tool

## Strengths and limitations of the study

- This study included ten teams from different parts of Sweden and a review of 600 records, which provided an overview of adverse events detected in home health care settings.
- The definition based on the National Coordinating Council for Medication Error Reporting and Prevention classification E was expanded to include all adverse events that resulted in temporary harm to the patient, regardless of whether an intervention was documented that could be seen as an improvement from a patient perspective.
- In any study based on record review, only adverse events that are documented in the record can be identified.
- Generalizability may be limited if home health care programs differ from the Swedish context at the sites being investigated.

## BACKGROUND

Home health care is increasingly becoming a component of health care as an alternative to hospitalization. It includes a variety of health care interventions. The purpose can be curative, supportive, palliative or rehabilitative. Safe solutions for care outside the hospital are important when planning for the future. The incidence and types of adverse events (AEs) in the acute care hospital setting have been well investigated in many countries and for several medical specialities.[1-7] Despite the challenges related to an aging population and citizens' demands to receive care at home, patient safety in home health care is rarely investigated.[8-12] Incidence rates of AEs of up to 13% have been reported in a Canadian context;[8, 11] falls and drug-related AEs are the most frequent.

Retrospective record review is commonly used to study patient harm using predefined triggers indicating potential AEs. More AEs are found through record review than through incident reporting systems.[13] One of the most frequently used methods for retrospective record review is the Global Trigger Tool,[14] which has been further adapted to suit different areas of health care.

The number of patients who are cared for in their homes is increasing. They are often aged, frail and have multiple diseases. Municipal home services provide assistance with activities of daily life, but medical and technical advances have made it possible for advanced treatment of complex and long-term illness to take place in the patient's home. As the complexity of care increases, interaction between multiple professionals from different health care providers (i.e. home health care, primary care, specialist care and social care) is critical for patient safety. New risks arise if communication and coordination of care is deficient. Thus, there is a need to further explore safety issues for patients admitted to home health care, taking into consideration the complexity of multiple caregivers involved in treatment and care. This study

1  
2 explores the origin, incidence, pattern and preventability of the AEs that occur in patients  
3  
4 admitted to receiving home health care.  
5  
6

## 7 **METHODS**

### 10 **Study setting**

11  
12 The study was set in Sweden, where assistance with activities of daily living is  
13  
14 provided in patients' homes by unlicensed staff (e.g. assistant nurses) organized by the  
15  
16 municipal social care service. The municipalities are also most often responsible for providing  
17  
18 home health care for older people.[15] Their health care organization includes unlicensed  
19  
20 assistant nurses, physiotherapists and occupational therapists, with registered nurses (RNs)  
21  
22 providing the highest medical competence. The RNs have the overall responsibility for  
23  
24 medication management and delivery of specialized health care in the patient's home and  
25  
26 consequently visit each patient less frequently than the unlicensed staff. When physician  
27  
28 resources are necessary, this is usually provided by primary care physicians but hospital  
29  
30 physicians may also become involved. All physicians are employed by the county councils.  
31  
32 Documentation between different caregivers is not always accessible to health care  
33  
34 professionals from other settings. As patients receiving home health care may simultaneously  
35  
36 be receiving care from different organizations, we found it important to include all  
37  
38 documented AEs in the home health care notes, irrespective of origin.  
39  
40  
41  
42  
43  
44  
45

### 46 **Definitions**

47  
48 In this study, an AE was defined as suffering, physical or psychological harm, illness  
49  
50 or death caused by health care or social care that was not an inevitable consequence of the  
51  
52 patient's condition or an expected effect of the treatment received by the patient because of  
53  
54 her/his condition. A preventable AE was defined as an event that could have been prevented if  
55  
56 adequate measures and/or actions had been taken during the patient's contact with health care  
57  
58 or social care. This definition is based on the terminology in the Swedish Patient Safety  
59  
60

1  
2 Act.[16] AEs related to acts of omission and AEs related to acts of commission were  
3  
4 included.  
5  
6

### 7 **Study sample, inclusion and exclusion criteria**

8  
9  
10 Ten review teams from different sites across Sweden were recruited using a  
11  
12 convenience sampling strategy. Seven teams were organized in the municipalities and three  
13  
14 teams were employed by the county councils. The teams consisted of one to three RNs and  
15  
16 one or two physicians. They all had long experience of working as RNs or physicians, and in  
17  
18 the home health care context.  
19

20  
21  
22 A random sample of 600 home health care admissions was reviewed during the period  
23  
24 from February to August 2016. In order to collect as rich data as possible, all patients 18 years  
25  
26 or older admitted to home health care during 2015 at the review sites were eligible for  
27  
28 inclusion. The review included the period from admission (index admission) up to a  
29  
30 maximum of 90 days after admission. If a patient was discharged from home health care and  
31  
32 was readmitted within the 90-day period, the review of that patient continued. To be included  
33  
34 as an AE in the study, one of the following criteria had to be met:  
35  
36

- 37  
38 1. The AE or no-harm incident occurred during the index admission, i.e. within 90 days after  
39  
40 enrolment in home health care, regardless of caregiver.
- 41  
42 2. The AE or no-harm incident derived from caregivers outside home health care (outpatient  
43  
44 care, social care or in-hospital care), occurred within 30 days prior to the index admission and  
45  
46 was detected during the index admission.  
47  
48

49  
50  
51 Randomization was performed by one of the authors (MU), using an online randomizer, to  
52  
53 ensure it was carried out in the same way for all review teams. Oversampling was carried out  
54  
55 with ten records per team. If a patient in the random sample was receiving limited home  
56  
57 health care once or twice a week, for example blood pressure measurement or delivery of pre-  
58  
59 dispensed drugs, this patient was replaced by another random admission. AEs that gave  
60



1  
2 symptoms more than 90 days after the start of the index admission or that occurred and were  
3  
4 detected and the treatment were completed before the start of the index admission were  
5  
6 excluded.  
7  
8  
9

## 10 11 12 **Education of the review teams**

13  
14 To ensure the validity and reliability of the results, the review process was  
15  
16 standardized in a written project manual, in which the definitions and the inclusion and  
17  
18 exclusion criteria were also included. A trigger manual was used, including trigger definitions  
19  
20 and preventability decision support, as well as detailed examples that were discussed by the  
21  
22 review teams before the study began. The team members underwent a mandatory one-day  
23  
24 education in the trigger tool methodology. Discussions were held to reach consensus about  
25  
26 definitions, exclusion and inclusion criteria, interpretation and application of the triggers,  
27  
28 judgement of AEs and preventability assessments, as well as how to use the two cases report  
29  
30 forms. During the process of familiarization with the methodology, each member of the  
31  
32 review team independently reviewed six training records in order to achieve reliable reviews.  
33  
34  
35  
36  
37

## 38 **Review process**

39  
40 The review was performed in a two-stage procedure. In most teams, the RNs carried  
41  
42 out both the primary and secondary reviews and later discussed the findings with the  
43  
44 physicians. In some teams, the physicians carried out some of the primary as well as the  
45  
46 secondary reviews.  
47  
48  
49

50 In the primary review stage, the reviewers screened all records for the presence of 38  
51  
52 predefined triggers categorized into four modules (Table 1). A trigger is an indicator  
53  
54 suggesting that an AE might have occurred during the inclusion period. For each trigger  
55  
56 detected, the reviewer determined whether or not the trigger reflected the presence of a  
57  
58 potential AE. Only records with triggers indicating a potential AE went forward to the  
59  
60

secondary review stage. The reviewers also recorded demographic data. Starting from the index admission to home health care, a maximum of 90 days was reviewed. There was no time restriction for the review of each record in this stage. To ensure inter-rater reliability, 10% of the records in the primary review process were reviewed by a secondary reviewer. Concordance was assessed between the reviewers' judgements concerning the presence of AEs in the primary review, and whether the record should be forwarded to the secondary review. Discussions about individual judgements were held and when consensus was reached, the records were ready for the secondary review stage.

**Table 1** List of triggers

| Care module |                                                                                       |
|-------------|---------------------------------------------------------------------------------------|
|             | Cardiac arrest and/or deterioration in vital signs                                    |
|             | Deep venous thrombosis and/or pulmonary embolus                                       |
|             | Pressure ulcer                                                                        |
|             | Blood vessel, skin and/or tissue harm                                                 |
|             | Neurological impairment and/or harm                                                   |
|             | Fall                                                                                  |
|             | Health care-associated infection                                                      |
|             | Moderate/severe pain                                                                  |
|             | Moderate/severe worry, anxiety, suffering, existential pain and/or psychological pain |
|             | Moderate/severe agitation and/or acute confusion/delirium                             |
|             | Undernutrition                                                                        |
|             | Insufficient oral health                                                              |
|             | Moderate/severe gastrointestinal problem                                              |
|             | Distended urinary bladder                                                             |
|             | Deviation from normal course after invasive/surgical treatment                        |
|             | Treatment                                                                             |
|             | Advanced medical device                                                               |
|             | Threats, violence and/or improper contact                                             |
|             | Self-inflicted harm                                                                   |
|             | Escape from home/special accommodation                                                |

|    |                                  |                                                                                              |
|----|----------------------------------|----------------------------------------------------------------------------------------------|
| 1  |                                  |                                                                                              |
| 2  |                                  | Documentation of mistake or dissatisfaction with care                                        |
| 3  |                                  |                                                                                              |
| 4  |                                  | Other                                                                                        |
| 5  |                                  |                                                                                              |
| 6  | Laboratory module                | Abnormal glucose value                                                                       |
| 7  |                                  |                                                                                              |
| 8  |                                  | Increasing creatinine value                                                                  |
| 9  |                                  |                                                                                              |
| 10 |                                  | Abnormal potassium value                                                                     |
| 11 |                                  | Abnormal sodium value                                                                        |
| 12 |                                  |                                                                                              |
| 13 |                                  | Abnormal calcium value                                                                       |
| 14 |                                  |                                                                                              |
| 15 | Medication module                | Adverse drug event/adverse drug reaction                                                     |
| 16 |                                  |                                                                                              |
| 17 |                                  | Drug that requires follow-up with blood sampling                                             |
| 18 |                                  |                                                                                              |
| 19 |                                  | Treatment with at least 10 drugs                                                             |
| 20 |                                  |                                                                                              |
| 21 |                                  | Absence of in-depth drug review                                                              |
| 22 |                                  |                                                                                              |
| 23 |                                  | Treatment with drugs that increase the risk for haemorrhage                                  |
| 24 |                                  | Drug management                                                                              |
| 25 |                                  |                                                                                              |
| 26 | Continuity and transition module | Unplanned change of care-providing unit                                                      |
| 27 |                                  |                                                                                              |
| 28 |                                  | Unplanned contact with physician and/or registered nurse                                     |
| 29 |                                  |                                                                                              |
| 30 |                                  | Absence of and/or deviation from care plan                                                   |
| 31 |                                  |                                                                                              |
| 32 |                                  | Absence of a coordinated individual care plan when care is provided by several caregivers    |
| 33 |                                  |                                                                                              |
| 34 |                                  | Documentation related to insufficient coordination of care, communication and/or information |
| 35 |                                  |                                                                                              |

---

In the secondary review stage, each potential AE was scrutinized individually. To qualify as an AE, a score of three or higher on a 4-point Likert scale was required (1, the AE was not related to health care/social care; 2, the AE was probably not related to health care/social care; 3, the AE was probably related to health care/social care; 4, the AE was related to health care/social care). The reviewer made a judgement whether or not the event qualified as an AE. If it did, the AE was marked for further assessment. The preventability of an AE was judged on a similar 4-point scale: 1, the AE was not preventable; 2, the AE was probably not preventable; 3, the AE was probably preventable; 4, the AE was preventable.[5]

In the following, probably preventable (grade 3) and preventable (grade 4) AEs are referred to as preventable AEs.

1  
2  
3  
4  
5  
6  
7  
8  
9  
10  
11  
12  
13  
14  
15  
16  
17  
18  
19  
20  
21  
22  
23  
24  
25  
26  
27  
28  
29  
30  
31  
32  
33  
34  
35  
36  
37  
38  
39  
40  
41  
42  
43  
44  
45  
46  
47  
48  
49  
50  
51  
52  
53  
54  
55  
56  
57  
58  
59  
60

The severity of harm was evaluated using two different scales. The first was the National Coordinating Council for Medication Error Reporting and Prevention (NCC MERP) Index (NCC MERP; <http://www.nccmerp.org/sites/default/files/indexBW2001-06-12.pdf>), which is used in the Global Trigger Tool.[14] NCC MERP Index categories E–I were included, i.e. those relating to harm (grade E, contributed to or resulted in temporary harm; grade F, contributed to or resulted in temporary harm to the patient and required outpatient, home health or hospital care, or prolonged hospitalization or an extended period of home health care; grade G, contributed to or resulted in permanent patient harm; grade H, lifesaving intervention required within 60 minutes; grade I, contributed to the patient’s death). The second severity scale was that used in the Harvard Medical Practice Study (HMPS)[17] and subsequently in several nationwide AE studies. It includes seven grades (minimal impairment, recovery within 1 month; moderate impairment, recovery within 1–6 months; moderate impairment, recovery within 6–12 months; permanent impairment, degree of disability  $\leq 50\%$ ; permanent impairment, degree of disability  $> 50\%$ ; contributed to patient death; unable to determine). All secondary reviewers also documented, e.g., the types of AEs as well as information on the origin of the AE (home health care, inpatient care, outpatient care or social care).

Access to different parts of the patients’ medical records differed between the review teams. The municipalities and county councils sometimes have separate medical record systems. Accordingly, some municipal review teams had to request physicians’ notes and laboratory values, for example, because these were stored in a county council’s record system.

All review teams were supported by record review experts in the research group who could answer questions; one of those (MU) monitored all reviews from the primary and secondary review stages for completeness and adherence to the trigger definitions and project manual. Any questions or discrepancies were referred back to the relevant team for resolution.

## Data analysis

Data are presented as median (range), mean (SD) (95% CI) or number (percent). We calculated the cumulative incidence of AEs over the review period. Comparisons between groups were made using the Mann-Whitney U test or the chi-squared test, as appropriate.  $p < 0.05$  was considered significant. All statistical calculations were made using Statistica 64 version 13 (StatSoft, Oklahoma, USA).

## RESULTS

A total of 600 patient records from home health care were reviewed; 280 of the patients were men, median age 79 years (range, 20–97 years), and 320 were women, median age 82 years (range, 29–99 years). The number of days reviewed days was 40 735 in total, with a median of 90 days per patient. Depending on patient discharge or death, the range of days reviewed varied between 1 and 90. Demographic data are shown in Table 2.

**Table 2** Demographic data

| Parameter                                        | Value                   |
|--------------------------------------------------|-------------------------|
| Men/women, n (%)                                 | 280 (46.7) / 320 (53.3) |
| Age in years, median (range)                     | 80.5 (20–99)            |
| Reviewed days, median (range)                    | 90 (1–90)               |
| Referral to home health care from                |                         |
| Hospital care, n (%)                             | 300 (50.0)              |
| Outpatient care, n (%)                           | 212 (35.3)              |
| Not possible to determine, n (%)                 | 88 (14.7)               |
| Medical diagnosis at home health care admission* |                         |
| Malignancy, n (%)                                | 253 (42.2)              |
| Cardiovascular disease, n (%)                    | 119 (19.8)              |
| Confusion, dementia, n (%)                       | 102 (17.0)              |
| Diabetes, n (%)                                  | 51 (8.5)                |
| Skin wound, pressure ulcer, n (%)                | 38 (6.3)                |

|                                                          |            |
|----------------------------------------------------------|------------|
| Stroke, n (%)                                            | 36 (6.0)   |
| Pulmonary disease, n (%)                                 | 35 (5.8)   |
| Neurological disease, n (%)                              | 33 (5.5)   |
| Medical needs at home health care admission†             |            |
| Medication assistance, n (%)                             | 233 (38.8) |
| Palliative care, n (%)                                   | 144 (24.0) |
| Activities of daily living, n (%)                        | 111 (18.5) |
| Laboratory sampling, n (%)                               | 88 (14.7)  |
| Wound care, assistance with compression stockings, n (%) | 74 (12.3)  |
| Assistance with advanced medical devices, n (%)          | 62 (10.3)  |
| Rehabilitation, home modifications, means testing, n (%) | 51 (8.5)   |
| Pain relief, n (%)                                       | 39 (6.5)   |
| Social situation at home health care admission           |            |
| Patient's own home, lives alone, n (%)                   | 265 (44.2) |
| Patient's own home, cohabiting, n (%)                    | 257 (42.8) |
| Home for medical health care, assistance 24/7, n (%)     | 50 (8.3)   |
| Not possible to determine, n (%)                         | 28 (4.7)   |

\*Medical diagnosis affecting >5% of patients. The patients could have several diagnoses.

†Medical needs for >5% of patients. The patients could have several medical needs.

The total percentage agreement (range between teams) of the reviewers' judgements concerning the presence of events in the primary review and whether the record should be forwarded to secondary review was 82.9% (46.2–94.7%) and 92.8% (75.0–100%), respectively.

Through the home health care records, 356 AEs were identified affecting 226 patients (37.7%). This corresponds to a median of 1 (range, 1–7) AE per patient affected (Table 3). Most were considered preventable (255, 71.6%). There was no difference in the incidence of AEs between men and women ( $p = 0.72$ ), or between patients aged 80 years or older and those less than 80 years ( $p = 0.12$ ) (data not shown).

**Table 3** Adverse events (AEs) detected in patients receiving home health care according to origin (n = 600)

|                                                               | Home health care | Care outside home health care | Total      |
|---------------------------------------------------------------|------------------|-------------------------------|------------|
| Number of AEs                                                 | 271              | 85                            | 356        |
| Number of patients affected by AEs (%)                        | 182 (30.3)       | 67 (11.2)                     | 226 (37.7) |
| Median number of AEs per affected patient (range)             | 1 (1–5)          | 1 (1–4)                       | 1 (1–7)    |
| Number of preventable AEs                                     | 194              | 61                            | 255        |
| Number of patients affected by preventable AEs (%)            | 137 (22.8)       | 50 (8.3)                      | 174 (29.0) |
| Median number of preventable AEs per affected patient (range) | 1 (1–4)          | 1 (1–4)                       | 1 (1–5)    |
| Number of patients with >1 AE (%)                             | 62 (10.3)        | 12 (2.0)                      | 83 (13.8)  |
| Number of patients with >1 preventable AE (%)                 | 39 (6.5)         | 8 (1.3)                       | 54 (9.0)   |
| Number of AEs per 100 patients                                | 45.2             | 14.2                          | 59.3       |
| Number of preventable AEs per 100 patients                    | 32.3             | 10.2                          | 42.5       |
| Number of AEs per 1000 patient days                           | 6.7              | 2.1                           | 8.7        |
| Number of preventable AEs per 1000 patient days               | 4.8              | 1.5                           | 6.3        |

Of the AEs, 271 (76.1 %) were related to home health care, 44 (12.4 %) to in-hospital care, 23 (6.5 %) to social care and 12 (3.4 %) to outpatient care. For the remaining 6 (1.7%) AEs, it was not possible to determine from the documentation where they had originated. There was no difference in preventability ( $p = 0.97$ ) between AEs originating from home health care or outside home health care.

According to the NCC MERP scale, 102 (28.6%) of all AEs resulted in temporary harm to the patient and 246 (69.1 %) in temporary harm that required extra health care visits or a prolonged care period. The HMPS scale showed that 213 (59.8%) of all AEs were minor with recovery within 1 month (Table 4). When comparing AEs originating from home health care and care given to the patients outside home health care, NCCP MERP revealed no difference in severity ( $p = 0.64$ ), but the HMPS classification did ( $p = 0.027$ ). When AEs

1  
2 where severity could not be determined were excluded, this difference no longer remained ( $p$   
3  
4 = 0.07).  
5  
6  
7  
8  
9  
10  
11  
12  
13  
14  
15  
16  
17  
18  
19  
20  
21  
22  
23  
24  
25  
26  
27  
28  
29  
30  
31  
32  
33  
34  
35  
36  
37  
38  
39  
40  
41  
42  
43  
44  
45  
46  
47  
48  
49  
50  
51  
52  
53  
54  
55  
56  
57  
58  
59  
60



**Table 4** Severity of adverse events (AEs) detected in patients receiving home health care according to origin

| Severity category                                |                                                                                                                                                                                           | In home health care |                       | Care outside home health care |                       | Total      |                       |
|--------------------------------------------------|-------------------------------------------------------------------------------------------------------------------------------------------------------------------------------------------|---------------------|-----------------------|-------------------------------|-----------------------|------------|-----------------------|
|                                                  |                                                                                                                                                                                           | AE, n (%)           | Preventable AE, n (%) | AE, n (%)                     | Preventable AE, n (%) | AE, n (%)  | Preventable AE, n (%) |
| Severity category according to NCCP MERP index   |                                                                                                                                                                                           |                     |                       |                               |                       |            |                       |
| E                                                | Contributed to or resulted in temporary harm                                                                                                                                              | 78 (28.8)           | 50 (64.1)             | 24 (28.2)                     | 14 (58.3)             | 102 (28.6) | 64 (62.7)             |
| F                                                | Contributed to or resulted in temporary harm to the patient and required outpatient, home health or hospital care, or prolonged hospitalization or an extended period of home health care | 187 (69.0)          | 142 (75.9)            | 59 (69.4)                     | 45 (76.3)             | 246 (69.1) | 187 (76.0)            |
| G                                                | Contributed to or resulted in permanent patient harm                                                                                                                                      | 3 (1.1)             | 1 (33.3)              | 2 (2.4)                       | 2 (100)               | 5 (1.4)    | 3 (60.0)              |
| H                                                | Lifesaving intervention required within 60 minutes                                                                                                                                        | 0 (0)               | 0 (0)                 | 0 (0)                         | 0 (0)                 | 0 (0)      | 0 (0)                 |
| I                                                | Contributed to patient's death                                                                                                                                                            | 3 (1.1)             | 1 (33.3)              | 0 (0)                         | 0 (0)                 | 3 (0.8)    | 1 (33.3)              |
| Total                                            |                                                                                                                                                                                           | 271 (100)           | 194 (71.6)            | 85 (100)                      | 61 (71.8)             | 356 (100)  | 255 (71.6)            |
| Severity category according to HMPS scale        |                                                                                                                                                                                           |                     |                       |                               |                       |            |                       |
| Minimal impairment, recovery within 1 month      |                                                                                                                                                                                           | 171 (63.1)          | 118 (69.0)            | 42 (49.4)                     | 31 (73.8)             | 213 (59.8) | 149 (69.9)            |
| Moderate impairment, recovery within 1–6 months  |                                                                                                                                                                                           | 57 (21.0)           | 44 (77.2)             | 26 (30.6)                     | 19 (73.1)             | 83 (23.3)  | 63 (75.9)             |
| Moderate impairment, recovery within 6–12 months |                                                                                                                                                                                           | 14 (5.2)            | 11 (78.6)             | 1 (1.2)                       | 0 (0)                 | 15 (4.2)   | 11 (73.3)             |
| Permanent impairment, degree of disability ≤50%  |                                                                                                                                                                                           | 3 (1.1)             | 1 (33.3)              | 2 (2.4)                       | 2 (100)               | 5 (1.4)    | 6 (83.3)              |
| Permanent impairment, degree of disability >50%  |                                                                                                                                                                                           | 0 (0)               | 0 (0)                 | 0 (0)                         | 0 (0)                 | 0 (0)      | 0 (0)                 |
| Contributed to patient death                     |                                                                                                                                                                                           | 3 (1.1)             | 1 (33.3)              | 0 (0)                         | 0 (0)                 | 3 (0.8)    | 1 (33.3)              |

|                     |           |            |           |           |           |            |
|---------------------|-----------|------------|-----------|-----------|-----------|------------|
| Unable to determine | 23 (8.5)  | 19 (82.6)  | 14 (16.5) | 9 (64.3)  | 37 (10.4) | 28 (75.7)  |
| Total               | 271 (100) | 194 (71.6) | 85 (100)  | 61 (71.8) | 356 (100) | 255 (71.6) |

NCCP MERP, National Coordinating Council for Medication Error Reporting and Prevention. HMPS, Harvard Medical Practice Study.

Table 5 Types of adverse events (AEs) detected in patients receiving home health care and the origin and proportion of preventable AEs, according to total n (%)

| Type of AE                        | Home health care, AEs n (%) | Preventable AEs in home health care, n (%) | Care outside home health care, AEs n (%) | Preventable AEs in care outside home health care, n (%) | Total AEs, n (%) | Total preventable AEs, n (%) |
|-----------------------------------|-----------------------------|--------------------------------------------|------------------------------------------|---------------------------------------------------------|------------------|------------------------------|
| Health care-associated infections | 59 (21.8)                   | 37 (62.7)                                  | 13 (15.3)                                | 9 (69.2)                                                | 72 (20.2)        | 46 (63.9)                    |
| Oral <i>Candida</i>               | 12 (25.4)                   | 6 (50.0)                                   | 1 (7.7)                                  | 0 (0.0)                                                 | 13 (18.1)        | 6 (46.1)                     |
| Urinary tract infection           | 9 (15.2)                    | 7 (77.8)                                   | 2 (15.4)                                 | 1 (50.0)                                                | 11 (15.3)        | 8 (72.7)                     |
| Pneumonia                         | 10 (16.9)                   | 7 (70.0)                                   | 1 (7.7)                                  | 1 (100.0)                                               | 11 (15.3)        | 8 (72.7)                     |
| Wound infection                   | 9 (15.2)                    | 9 (100.0)                                  | 3 (23.1)                                 | 3 (100.0)                                               | 12 (16.6)        | 12 (100.0)                   |
| Sepsis                            | 5 (8.5)                     | 0 (0.0)                                    | 1 (7.7)                                  | 1 (100.0)                                               | 6 (8.3)          | 1 (16.7)                     |
| Skin <i>Candida</i>               | 5 (8.5)                     | 5 (100.0)                                  | 1 (7.7)                                  | 1 (100.0)                                               | 6 (8.3)          | 6 (100.0)                    |
| Others                            | 9 (15.2)                    | 3 (33.3)                                   | 4 (30.8)                                 | 2 (50.0)                                                | 13 (18.1)        | 5 (38.5)                     |
| Falls                             | 51 (18.8)                   | 22 (43.1)                                  | 15 (17.6)                                | 7 (46.7)                                                | 66 (18.5)        | 29 (43.9)                    |

|    |                                      |           |           |           |           |           |           |
|----|--------------------------------------|-----------|-----------|-----------|-----------|-----------|-----------|
| 1  |                                      |           |           |           |           |           |           |
| 2  |                                      |           |           |           |           |           |           |
| 3  |                                      |           |           |           |           |           |           |
| 4  |                                      |           |           |           |           |           |           |
| 5  | Fracture                             | 7 (13.7)  | 4 (57.1)  | 4 (26.7)  | 2 (50.0)  | 11 (16.7) | 6 (54.5)  |
| 6  |                                      |           |           |           |           |           |           |
| 7  | Skin wound                           | 33 (64.7) | 11 (33.3) | 7 (46.7)  | 3 (42.9)  | 40 (60.6) | 14 (35.0) |
| 8  |                                      |           |           |           |           |           |           |
| 9  | Pain                                 | 11 (21.6) | 7 (63.6)  | 3 (30.0)  | 1 (33.3)  | 14 (21.2) | 8 (57.1)  |
| 10 |                                      |           |           |           |           |           |           |
| 11 | Not specified                        | 0 (0)     | –         | 1 (6.7)   | 1 (100.0) | 1 (1.5)   | 1 (100.0) |
| 12 |                                      |           |           |           |           |           |           |
| 13 | Pressure ulcers                      | 46 (17.0) | 38 (82.6) | 16 (18.8) | 14 (87.5) | 62 (17.4) | 52 (83.9) |
| 14 |                                      |           |           |           |           |           |           |
| 15 | Category 1                           | 20 (43.5) | 17 (85.0) | 4 (25.0)  | 4 (100.0) | 24 (38.7) | 21 (87.5) |
| 16 |                                      |           |           |           |           |           |           |
| 17 | Category 2                           | 17 (37.0) | 13 (76.5) | 8 (50.0)  | 6 (75.0)  | 25 (40.3) | 19 (76.0) |
| 18 |                                      |           |           |           |           |           |           |
| 19 | Category 3                           | 3 (6.5)   | 2 (66.7)  | 2 (12.5)  | 2 (100.0) | 5 (8.0)   | 4 (80.0)  |
| 20 |                                      |           |           |           |           |           |           |
| 21 | Category 4                           | 2 (4.3)   | 2 (100.0) | 0 (0)     | –         | 2 (3.2)   | 2 (100.0) |
| 22 |                                      |           |           |           |           |           |           |
| 23 | Category unknown                     | 4 (8.7)   | 4 (100.0) | 2 (12.5)  | 2 (100.0) | 6 (9.7)   | 6 (100.0) |
| 24 |                                      |           |           |           |           |           |           |
| 25 | Skin, vessel or tissue harm          | 25 (9.2)  | 21 (84.0) | 8 (9.4)   | 6 (75.0)  | 33 (9.3)  | 27 (81.8) |
| 26 |                                      |           |           |           |           |           |           |
| 27 | Skin harm                            | 18 (72.0) | 15 (83.3) | 4 (25.0)  | 3 (75.0)  | 22 (66.7) | 18 (81.8) |
| 28 |                                      |           |           |           |           |           |           |
| 29 | Vessel harm                          | 4 (16.0)  | 3 (75.0)  | 1 (12.5)  | 0 (0.0)   | 5 (15.2)  | 3 (80.0)  |
| 30 |                                      |           |           |           |           |           |           |
| 31 | Tissue harm                          | 3 (12.0)  | 3 (100.0) | 3 (37.5)  | 3 (100.0) | 6 (18.2)  | 6 (100.0) |
| 32 |                                      |           |           |           |           |           |           |
| 33 | Pain                                 | 17 (6.3)  | 16 (94.1) | 6 (7.1)   | 5 (83.3)  | 23 (6.5)  | 21 (91.3) |
| 34 |                                      |           |           |           |           |           |           |
| 35 | Psychological harm                   | 12 (4.4)  | 9 (75.0)  | 6 (7.1)   | 5 (83.3)  | 18 (5.1)  | 14 (77.8) |
| 36 |                                      |           |           |           |           |           |           |
| 37 | Other                                | 10 (3.7)  | 9 (90.0)  | 1 (1.2)   | 1 (100.0) | 11 (3.1)  | 10 (90.1) |
| 38 |                                      |           |           |           |           |           |           |
| 39 | Neurological harm                    | 7 (2.6)   | 6 (85.7)  | 3 (3.5)   | 3 (100.0) | 10 (2.8)  | 9 (90.0)  |
| 40 |                                      |           |           |           |           |           |           |
| 41 | Haemorrhage (not related to surgery) | 7 (2.6)   | 3 (42.9)  | 3 (3.5)   | 1 (33.3)  | 10 (2.8)  | 4 (40.0)  |
| 42 |                                      |           |           |           |           |           |           |
| 43 |                                      |           |           |           |           |           |           |
| 44 |                                      |           |           |           |           |           |           |
| 45 |                                      |           |           |           |           |           |           |
| 46 |                                      |           |           |           |           |           |           |
| 47 |                                      |           |           |           |           |           |           |
| 48 |                                      |           |           |           |           |           |           |
| 49 |                                      |           |           |           |           |           |           |

|    |                                        |             |            |            |           |             |            |
|----|----------------------------------------|-------------|------------|------------|-----------|-------------|------------|
| 1  |                                        |             |            |            |           |             |            |
| 2  |                                        |             |            |            |           |             |            |
| 3  |                                        |             |            |            |           |             |            |
| 4  |                                        |             |            |            |           |             |            |
| 5  | Failure in vital signs                 | 7 (2.6)     | 6 (85.7)   | 3 (3.5)    | 3 (100.0) | 10 (2.8)    | 9 (90.0)   |
| 6  |                                        |             |            |            |           |             |            |
| 7  | Weight loss, nutrition-related AE      | 5 (1.8)     | 4 (80.0)   | 3 (3.5)    | 3 (100.0) | 8 (2.2)     | 7 (87.5)   |
| 8  |                                        |             |            |            |           |             |            |
| 9  | General deterioration in health status | 7 (2.6)     | 7 (100.0)  | 0 (0)      | –         | 7 (2.0)     | 7 (100.0)  |
| 10 |                                        |             |            |            |           |             |            |
| 11 | Severe constipation                    | 5 (1.8)     | 5 (100.0)  | 0 (0)      | –         | 5 (1.4)     | 5 (100.0)  |
| 12 |                                        |             |            |            |           |             |            |
| 13 | Severe vomiting                        | 4 (1.5)     | 3 (75.0)   | 0 (0)      | –         | 4 (1.1)     | 3 (75.0)   |
| 14 |                                        |             |            |            |           |             |            |
| 15 | Affected laboratory values             | 3 (1.1)     | 3 (100.0)  | 1 (1.2)    | 1 (100.0) | 4 (1.1)     | 4 (100.0)  |
| 16 |                                        |             |            |            |           |             |            |
| 17 | Allergic reaction                      | 1 (0.4)     | 0 (0.0)    | 2 (2.4)    | 1 (50.0)  | 3 (0.8)     | 1 (33.3)   |
| 18 |                                        |             |            |            |           |             |            |
| 19 | Severe diarrhoea                       | 1 (0.4)     | 1 (100.0)  | 2 (2.4)    | 0 (0.0)   | 3 (0.8)     | 1 (33.3)   |
| 20 |                                        |             |            |            |           |             |            |
| 21 | Distended urinary bladder              | 2 (0.7)     | 2 (100.0)  | 2 (2.4)    | 2 (100.0) | 4 (1.2)     | 4 (100)    |
| 22 |                                        |             |            |            |           |             |            |
| 23 | Dehydration                            | 1 (0.4)     | 1 (100.0)  | 1 (1.2)    | 0 (0.0)   | 2 (0.6)     | 1 (50.0)   |
| 24 |                                        |             |            |            |           |             |            |
| 25 | Attempted suicide                      | 1 (0.4)     | 1 (100.0)  | 0 (0)      | –         | 1 (0.3)     | 1 (100.0)  |
| 26 |                                        |             |            |            |           |             |            |
| 27 | Total                                  | 271 (100.0) | 194 (71.6) | 85 (100.0) | 61 (71.8) | 356 (100.0) | 255 (71.6) |

1 The most common types of AEs were health care-associated infections, falls and  
2  
3 pressure ulcers (Table 5). There were no differences in the number of such AEs between men  
4  
5 and women or between patients aged 80 years or older and those less than 80 years (data not  
6  
7 shown). The probability of falls being preventable was 43.9%, whereas the majority of the  
8  
9 other types of AEs were considered preventable to a greater extent. There was no difference in  
10  
11 the type of AEs between those originating from home health care and those from care given to  
12  
13 patients outside home health care ( $p = 0.52$ ).  
14  
15

16  
17  
18 Forty-one (18.1%) of the AEs in the home health care setting required a median of one  
19  
20 (range, 1–5) additional physician visit(s) in an outpatient setting, 40 (14.8 %) required a  
21  
22 median of 1 (range, 1–9) additional physician visit(s) in the home health care setting and 37  
23  
24 (13.7%) required hospital care for a median of 6 days (range, 1–41 days). There were no  
25  
26 significant differences compared with AEs outside home health care: 7 (8.2%) (median, 1;  
27  
28 range, 1–2) additional physician visit(s) in an outpatient setting; 11 (12.9%) (median, 1;  
29  
30 range, 1–11) additional physician visit(s) in the home health care setting; 13 (15.3%) required  
31  
32 hospital care for a median of 7 days (range, 2–10 days).  
33  
34

## 35 36 37 **DISCUSSION**

38  
39  
40 This study is the first to assess AEs in patients receiving home health care across  
41  
42 different parts of Sweden through the use of retrospective record review. Our main findings  
43  
44 are that AEs affect over a third of these patients, are deemed to be mostly preventable and  
45  
46 result in temporary harm to the patient requiring extra health care resources. One fourth of the  
47  
48 AEs detected in home health care originated in other health care settings. We found no  
49  
50 differences in the types of AEs, the severity or preventability, regardless of the origin.  
51  
52

53  
54  
55 There are few studies investigating AEs in home health care with which to compare  
56  
57 our findings. The incidence of AEs, 37.7%, is much higher than the 4–13% reported by other  
58  
59 studies. [8,9,10,11] It is difficult to compare the rates because the differences may be due to  
60

1 varying services, patient characteristics, and methods of record review, as well as the  
2  
3 definition of an AE and the inclusion criteria used. It is also difficult to compare the rates for  
4  
5 the home health care setting with in-hospital AE rates, because the home health care provider  
6  
7 may not continuously overview the patients and the health care environment.  
8  
9

10  
11 Patients receiving home health care are often old and vulnerable and frequently have  
12  
13 concomitant contact with different caregivers. We have shown that almost 25% of AEs found  
14  
15 in patients in home health care originated in care given in other settings. The continued care  
16  
17 of a patient with AEs such as pressure ulcers or infections impose an additional burden on the  
18  
19 home health care organization with its limited access to RNs and physicians. This finding also  
20  
21 highlights the importance of learning about AEs between caregivers. The pattern of AEs  
22  
23 originating within or outside home health care is similar and may predominately characterize  
24  
25 the risks for this group of elderly fragile patients, irrespective of the health care setting. The  
26  
27 findings imply that all sections of health care should be aware of these most common AEs and  
28  
29 preventive measures that can be taken along the patients' health care journey.  
30  
31  
32  
33

34  
35 Almost three out of four AEs were judged preventable by the review teams in our  
36  
37 study, regardless of origin. This is higher than the 33–56% previously reported in the home  
38  
39 health care setting[8,9,] but is in line with many hospital record reviews.[1, 5, 6, 18] Risk  
40  
41 reduction in a patient's home is not directly transferable from hospital care. The possibility of  
42  
43 conflict between patient autonomy and safety should be considered in the home care setting.  
44  
45 Patients are the hosts of the care environment and supervision by health care personnel is  
46  
47 mostly limited to short visits. Preventive safety measures in a patient's home requires true  
48  
49 patient involvement, taking the patient's values and integrity into consideration; e.g. removing  
50  
51 carpets to prevent falls, one of the AEs with the lowest preventability ratings, must be  
52  
53 weighed against a patient's own wishes.  
54  
55  
56

57  
58 Our findings of health care-associated infections, falls, pressure ulcers and skin  
59  
60 breakdown as the most common AEs are largely consistent with a Canadian review of 1200

1 records during 2009–2010, which reported falls, wound infections, psychosocial, behavioural  
2 or mental health problems, or medication-related AEs as the most prominent findings.[9]  
3  
4  
5 Other studies also report injurious falls as the most common AE in home health care.[11, 19]  
6  
7 Decline in physical function is a prevalent safety risk.[10] Falls are also associated with  
8  
9 increased risk of admission to long-term care and of death.[11] This emphasizes the need to  
10  
11 find effective strategies for prevention of falls. Preventive strategies for pressure ulcers and  
12  
13 skin breakdown[8] also need to be addressed. Patients in home health care may have several  
14  
15 well-known risk factors for pressure ulcers. One tenth of AEs in patients receiving home  
16  
17 health care was characterized as general decline.[8] The aging patient is at risk for weight loss  
18  
19 and malnutrition. Doran et al.[10] noted that unintended weight loss accounted for 10% of the  
20  
21 safety problems in home health care. Patients receiving home health care are often affected by  
22  
23 cancer, where weight loss is a well-known problem.[10,20] Routines for the prevention of  
24  
25 weight loss are important. Interventions can include energy- and protein-rich food, food with  
26  
27 a particular texture, artificial nutrition, information about eating habits and checking the  
28  
29 patient's weight on a regular basis.[21]  
30  
31  
32  
33  
34

35 Health care-associated infections are common in both home health care and hospital  
36  
37 care.[1, 22] Falls and pressure ulcers are also common in hospitalized patients. However, the  
38  
39 pattern of AEs in home health care differs from that in hospital care in other aspects.  
40  
41 Surgical/procedural AEs and distended urinary bladder are more common in hospital care.[1,  
42  
43 6, 18, 23, 24]  
44  
45  
46

47 We found that more than half of the AEs caused minimal impairment, with recovery  
48  
49 within 1 month. This is in contrast to the findings of Sears et al.,[8] where one quarter of the  
50  
51 AEs caused slight impairment and half resulted in moderate to serious impairment or death.  
52  
53 One explanation for the difference could be that we found three times more AEs and probably  
54  
55 included less severe AEs. Sears et al.[8] only included AEs that required the use of additional  
56  
57 health care resources. Interventions in connection with AEs are a resource-consuming burden  
58  
59  
60

1 to health care. In order to get a broader and more proactive approach to patient safety, we  
2  
3 found it important to include AEs that caused temporary harm without requiring extra visits or  
4  
5 a prolonged health care period.  
6  
7

8  
9 We chose to review a period up to a maximum of 90 days from the start of a randomly  
10  
11 chosen home health care period and included all AEs regardless of caregiver. If a patient was  
12  
13 hospitalized and returned to home health care during that period, we included the new home  
14  
15 health care period(s). The Institute for Healthcare Improvement has developed a trigger tool  
16  
17 for skilled nursing facilities recommending that only the first 30 days in an admission are  
18  
19 reviewed.[25] Blais et al.[9] included a period of up to 12 months preceding discharge for  
20  
21 review and also included a 6-month period after discharge from the index admission. There is  
22  
23 no consensus regarding which triggers to use in different kinds of settings.[26] The same  
24  
25 applies for reporting of AE rates, as well as characterization of AEs, which makes  
26  
27 comparisons difficult. As interest in home health care safety increases, in parallel with the  
28  
29 increased demand for the service, reliable and validated safety tools are warranted.  
30  
31  
32  
33

34 The strengths of this study include having ten teams from different parts of Sweden to  
35  
36 review 600 records, which served to give an overview of AEs occurring in home health care  
37  
38 settings. In accordance with the Global Trigger Tool methodology and as patients receiving  
39  
40 home health care sometimes need parallel interventions from caregivers outside home health  
41  
42 care, we chose a broader perspective on patient safety and included all AEs that occurred  
43  
44 and/or were detected during the 90-day review period. We modified our definition based on  
45  
46 NCC MERP classification E to include all AEs that resulted in temporary harm to the patient,  
47  
48 regardless of whether an intervention was documented or not. We regard this as an  
49  
50 improvement from a patient perspective. To suit the patients and to visualize the extra  
51  
52 resources related to AEs, we also expanded NCC MERP classification F to include extra  
53  
54 visits within home health care and outpatient care. This study also has a number of  
55  
56 limitations. In any study based on record review, only AEs that are noted in the record can be  
57  
58  
59  
60



1 found. Generalizability may be limited if home health care programmes differ from the  
2  
3 Swedish context at the investigation sites. As this study forms a basis for a national trigger  
4  
5 tool for home health care, we aimed for richer review material and limited inclusion by  
6  
7 excluding patients receiving infrequent home health care.  
8  
9

## 10 11 **CONCLUSIONS**

12  
13  
14 AEs in patients admitted to home health care are common, mostly preventable and  
15  
16 often result in temporary harm that requires extra health care resources. As in hospital care,  
17  
18 health care-associated infections, falls and pressure ulcers are common AEs. The latter two  
19  
20 are even more common in home health care, as is harm to skin, vessels and tissue. This  
21  
22 implies that we must address how home health care is provided. This is an important area for  
23  
24 future studies.  
25  
26

## 27 28 **Funding**

29  
30  
31 Financial support was provided through FORSS (No 470161) - Medical Research  
32  
33 Council of Southeast Sweden and the Region Östergötland (LiO-537211).  
34  
35 The funders have neither been involved in any part of the study, nor in writing the  
36  
37 manuscript or the decision to submit the manuscript for publication.  
38  
39  
40  
41  
42  
43  
44

## 45 **Competing interests**

46  
47 The authors declare that they have no competing interests.  
48  
49

## 50 51 **Contributors**

52  
53  
54 KS, MU, ME, ML and LN designed and conducted the study. KS, MU and LN undertook the  
55  
56 initial interpretation of the data, which was followed by discussions with all the authors. All  
57  
58  
59  
60

1 authors drafted the manuscript and were part of the revision process. All authors agreed to the  
2  
3 final version of the manuscript before submission.  
4  
5

## 6 **Data sharing statement**

7  
8  
9 No additional data are available.  
10  
11

## 12 **REFERENCES**

- 13  
14  
15 1. Soop M, Fryksmark U, Köster M, et al. The incidence of adverse events in Swedish  
16  
17 hospitals: a retrospective medical record review study. *Int J Qual Health Care*  
18  
19 2009;21:285–91.  
20  
21
- 22  
23  
24 2. von Plessen C, Kodal AM, Anhoj J. Experiences with global trigger tool reviews in five  
25  
26 Danish hospitals: an implementation study. *BMJ Open*;2:1–8.  
27  
28
- 29  
30  
31 3. Resar RK, Rozich JD, Simmonds T, et al. A trigger tool to identify adverse events in the  
32  
33 intensive care unit. *Jt Comm J Qual Patient Saf* 2006;32:585–90.  
34  
35
- 36  
37  
38 4. Kaafarani HM, Rosen AK, Nebeker JR, et al. Development of trigger tools for surveillance  
39  
40 of adverse events in ambulatory surgery. *Qual Saf Health Care* 2010;19:425–9.  
41  
42
- 43  
44  
45 5. Unbeck M, Lindemalm S, Nydert P, et al. Validation of triggers and development of a  
46  
47 pediatric trigger tool to identify adverse events. *BMC Health Serv Res* 2014;14:655.  
48  
49
- 50  
51  
52 6. Nilsson L, Risberg MB, Montgomery A, et al. Preventable adverse events in surgical care  
53  
54 in Sweden: a nationwide review of patient notes. *Medicine (Baltimore)*  
55  
56 2016;95:e3047.  
57  
58
- 59  
60 7. Mattsson TO, Knudsen JL, Lauritsen J, et al. Assessment of the global trigger tool to  
measure, monitor and evaluate patient safety in cancer patients: reliability concerns are  
raised. *BMJ Qual Saf* 2013;22:571–9.

- 1 8. Sears N, Baker GR, Barnsley J, et al. The incidence of adverse events among home care  
2 patients. *Int J Qual Health Care* 2013;25:16–28.  
3  
4  
5  
6 9. Blais R, Sears NA, Doran D, et al. Assessing adverse events among home care clients in  
7 three Canadian provinces using chart review. *BMJ Qual Saf* 2013;22:989–97.  
8  
9  
10  
11 10. Doran DM, Hirdes JP, Blais R, et al. The nature of safety problems among Canadian  
12 homecare clients: evidence from the RAI-HC reporting system. *J Nurs Manage*  
13 2009;17:165–74.  
14  
15  
16  
17  
18 11. Doran DM, Hirdes JP, Blais R, et al. Adverse events among Ontario home care clients  
19 associated with emergency room visit or hospitalization: a retrospective cohort study.  
20  
21  
22 *BMC Health Serv Res* 2013;13:227.  
23  
24  
25  
26 12. Madigan E. A description of adverse events in home healthcare. *Home Healthc Nurse*  
27 2007;25:191–7.  
28  
29  
30 13. Classen DC, Resar R, Griffin F, et al. Global Trigger Tool' shows that adverse events in  
31 hospitals may be ten times greater than previously measured. *Health Affairs*  
32 2011;30:581–9.  
33  
34  
35  
36  
37 14. Griffin F, Resar R. IHI Global Trigger Tool for Measuring Adverse Events. 2nd ed.  
38 Cambridge, MA: Institute for Healthcare Improvement; 2009.  
39  
40  
41  
42 15. Anell A, Glenngård AH, Merkur S. Sweden: health system review. *Health Syst Transit*  
43 2012;14:1–159.  
44  
45  
46  
47 16. SFS 2010:659. Patientsäkerhetslagen [Patient Safety Act]. 2010. Stockholm: Riksdagen.  
48  
49 [https://www.riksdagen.se/sv/dokument-lagar/dokument/svensk-  
51 forfattningssamling/patientsakerhetslag-2010659\\_sfs-2010-659](https://www.riksdagen.se/sv/dokument-lagar/dokument/svensk-<br/>50 forfattningssamling/patientsakerhetslag-2010659_sfs-2010-659) (accessed Mar 20  
52 2017).  
53  
54  
55  
56  
57  
58  
59  
60

- 1  
2  
3  
4  
5  
6  
7  
8  
9  
10  
11  
12  
13  
14  
15  
16  
17  
18  
19  
20  
21  
22  
23  
24  
25  
26  
27  
28  
29  
30  
31  
32  
33  
34  
35  
36  
37  
38  
39  
40  
41  
42  
43  
44  
45  
46  
47  
48  
49  
50  
51  
52  
53  
54  
55  
56  
57  
58  
59  
60
17. Brennan TA, Leape LL, Laird NM, et al. Incidence of adverse events and negligence in hospitalized patients. Results of the Harvard Medical Practice Study I. *N Engl J Med* 1991;324:370–6.
  18. Kennerly DA, Saldana M, Kudyakov R, et al. Description and evaluation of adaption to the Global Trigger Tool to enhance value to adverse event reduction efforts. *J Patient Saf* 2013;9:87–95.
  19. Johnson K. Adverse events among Winnipeg Home Care clients. *Healthc Q* 2006;9 Spec No:127–34.
  20. Tisdale MJ. Cachexia in cancer patients. *Nat Rev Cancer* 2002;2:862–71.
  21. Alibhai SMH, Greenwood C, Payette H. An approach to the management of unintentional weight loss in elderly people. *CMAJ* 2005;172:773–80.
  22. Deilkås ET, Bukholm G, Lindstrom JC, et al. Monitoring adverse events in Norwegian hospitals from 2010 to 2013. *BMJ Open* 2015;5:e008576.
  23. Unbeck M, Muren O, Lillkrona U. Identification of adverse events at an orthopedics department in Sweden. *Acta Orthop* 2008;79:396–403.
  24. Unbeck M, Dalen N, Muren O, Lillkrona U, Härenstam KP. Healthcare processes must be improved to reduce the occurrence of orthopaedic adverse events. *Scand J Caring Sci* 2010;24(4):671-7. doi: 10.1111/j.1471-6712.2009.00760.x.
  25. Adler L, Moore J, Federico F. IHI Skilled Nursing Facility Trigger Tool for Measuring Adverse Events. Cambridge, MA: Institute for Healthcare Improvement; 2015.  
<http://www.ihl.org/resources/Pages/Tools/SkilledNursingFacilityTriggerTool.aspx>  
(accessed Dec 30 2016).
  26. Hibbert PD, Molloy CJ, Hooper TD, et al. The application of the Global Trigger Tool: a systematic review. *Int J Qual Health Care* 2016;28:640–9.

# BMJ Open

## Adverse events in patients in home health care: a cohort study using trigger tool methodology

|                                 |                                                                                                                                                                                                                                                                                                                                                                                                                                                                                                                                                                                                                      |
|---------------------------------|----------------------------------------------------------------------------------------------------------------------------------------------------------------------------------------------------------------------------------------------------------------------------------------------------------------------------------------------------------------------------------------------------------------------------------------------------------------------------------------------------------------------------------------------------------------------------------------------------------------------|
| Journal:                        | <i>BMJ Open</i>                                                                                                                                                                                                                                                                                                                                                                                                                                                                                                                                                                                                      |
| Manuscript ID                   | bmjopen-2017-019267.R1                                                                                                                                                                                                                                                                                                                                                                                                                                                                                                                                                                                               |
| Article Type:                   | Research                                                                                                                                                                                                                                                                                                                                                                                                                                                                                                                                                                                                             |
| Date Submitted by the Author:   | 09-Oct-2017                                                                                                                                                                                                                                                                                                                                                                                                                                                                                                                                                                                                          |
| Complete List of Authors:       | Schildmeijer, Kristina; School of Health and Caring Sciences, Linnaeus University<br>Unbeck, Maria; Karolinska Institutet, Department of Clinical Sciences at Danderyd Hospital, Division of Orthopaedics<br>Ekstedt, Mirjam; Karolinska Institutet, LIME; Linneuniversitet<br>Lindblad, Marlène; Kungliga Tekniska Hogskolan, School of Technology and Health; Karolinska Institutet, LIME<br>Nilsson, Lena; Division of Drug Research, Anesthesiology and Intensive Care, Department of Medical and Health Sciences, Faculty of Health Sciences, Linköping University, Department of Anesthesia and Intensive Care |
| <b>Primary Subject Heading</b>: | Health services research                                                                                                                                                                                                                                                                                                                                                                                                                                                                                                                                                                                             |
| Secondary Subject Heading:      | Medical management                                                                                                                                                                                                                                                                                                                                                                                                                                                                                                                                                                                                   |
| Keywords:                       | Quality in health care < HEALTH SERVICES ADMINISTRATION & MANAGEMENT, Health & safety < HEALTH SERVICES ADMINISTRATION & MANAGEMENT, Home health care, Patient safety, Trigger Tool, Patient harm                                                                                                                                                                                                                                                                                                                                                                                                                    |
|                                 |                                                                                                                                                                                                                                                                                                                                                                                                                                                                                                                                                                                                                      |

SCHOLARONE™  
Manuscripts

1  
2  
3 Adverse events in patients in home health care: a cohort study  
4  
5  
6 using trigger tool methodology  
7  
8  
9

10 Kristina Schildmeijer,<sup>1</sup> Maria Unbeck,<sup>2,3</sup> Mirjam Ekstedt,<sup>1,4</sup> Marlene Lindblad,<sup>5,6</sup>

11  
12 Lena Nilsson<sup>7</sup>  
13  
14

15 <sup>1</sup>Department of Health and Caring Sciences, Linnaeus University, Kalmar, Sweden  
16

17 <sup>2</sup>Department of Orthopaedics, Danderyd Hospital, Stockholm, Sweden  
18  
19

20 <sup>3</sup>Department of Clinical Sciences, Danderyd Hospital, Karolinska Institutet, Stockholm,  
21  
22 Sweden  
23

24 <sup>4</sup>Department of Learning, Informatics, Management and Ethics, Karolinska Institutet,  
25  
26 Stockholm, Sweden  
27  
28

29 <sup>5</sup>Royal Institute of Technology, School of Technology and Health, Stockholm, Sweden  
30  
31

32 <sup>6</sup>Department of Health Care Sciences, Ersta Sköndal University College, Stockholm,  
33  
34 Sweden  
35  
36

37 <sup>7</sup>Department of Anaesthesiology and Intensive Care, Department of Medical and Health  
38  
39 Sciences, Linköping University, Linköping, Sweden  
40  
41

42 \*Correspondence to: Kristina Schildmeijer; [kristina.schildmeijer@lnu.se](mailto:kristina.schildmeijer@lnu.se)  
43

44 Word count: 3953  
45  
46  
47  
48  
49  
50  
51  
52  
53  
54  
55  
56  
57  
58  
59  
60

## ABSTRACT

**Objective:** Home health care is an increasingly common part of health care. The patients are often aged, frail and have multiple diseases, and multiple caregivers are involved in their treatment. This study explores the origin, incidence, types and preventability of adverse events (AEs) that occur in patients receiving home health care.

**Design:** A cohort study using retrospective record review and trigger tool methodology.

**Setting and methods:** Ten teams with experience of home health care from nine regions across Sweden reviewed home health care records in a two-stage procedure using 38 predefined triggers in four modules. A random sample of records from 600 patients (18 years or older) receiving home health care during 2015 were reviewed.

**Primary and secondary outcome measures:** The cumulative incidence of AEs found in patients receiving home health care; secondary measures were origin, types, severity of harm and preventability of the AEs.

**Results:** The patients were 20–79 years old, 280 men and 320 women. The review teams identified 356 AEs in 226 (37.7%; 95% CI 33.0–42.8) of the home health care records. Of these, 255 (71.6%; 95% CI 63.2–80.8) were assessed as being preventable, and most (246, 69.1%; 95% CI 60.9–78.2) required extra health care visits or led to a prolonged period of health care. Most of the AEs (271, 76.1%; 95% CI 67.5–85.6) originated in home health care; the rest were detected during home health care but were related to care outside home health care. The most common AEs were health care-associated infections, falls and pressure ulcers.

**Conclusions:** AEs in patients receiving home health care are common, mostly preventable and often cause temporary harm requiring extra health care resources. The most frequent types of AEs must be addressed and reduced through improvements in inter-professional collaboration. This is an important area for future studies.

**Keywords:** Home health care, Patients, Adverse events, Patient harm, Patient safety, Trigger tool

## Strengths and limitations of the study

- The review process was standardized and included a manual with detailed trigger definitions and preventability decision support.
- The review team members had long experience of home health care.
- Our recruitment of review teams was based on convenience sampling and did not enable review of a stratified sample of patients receiving home health care in Sweden.
- The results can only be generalized to facilities with similar organizations and clinical standards.



## BACKGROUND

Home health care is an increasingly common component of health care, as an alternative to hospitalization. It includes a variety of health care interventions. The purpose can be curative, supportive, palliative or rehabilitative. Safe solutions for care outside the hospital are important. The incidence and types of adverse events (AEs) in the acute care hospital setting have been well-investigated in many countries and for several medical specialities.[1-7] Despite the challenges related to an aging population and citizens' demands to receive care at home, patient safety in home health care is rarely investigated.[8-12] Incidence rates of AEs of up to 13% have been reported in a Canadian context;[8, 11] falls and drug-related AEs are the most frequent.

Retrospective record review is commonly used to study patient harm using predefined triggers indicating potential AEs. More AEs are found through record review than through incident reporting systems.[13] One of the most frequently used methods for retrospective record review is the Global Trigger Tool,[14] which has been further adapted to suit different areas of health care.

The number of patients who are cared for in their homes is increasing. They are often aged, frail and have multiple diseases. Municipal home services provide assistance with activities in daily life, but medical and technical advances have also made it possible for advanced treatment of complex and long-term illnesses in patient homes. As the complexity of care increases, interaction between multiple professionals from different health care providers (i.e., home health care, primary care, specialist care and social care) is critical for patient safety. New risks arise if communication and coordination of care is deficient. Thus, there is a need to further explore safety issues for patients receiving home health care, taking into consideration the complexity of having multiple caregivers involved in treatment and care. We have developed and validated a trigger tool intended for this group of patients.[15]

1  
2 This study explores the origin, incidence, types and preventability of the AEs that occur in  
3  
4 patients receiving home health care.  
5

## 6 7 **METHODS**

### 8 9 10 **Study setting**

11  
12 The study was set in Sweden, where assistance with activities in daily life is provided in  
13  
14 patient homes by unlicensed staff (e.g., assistant nurses) on behalf of the municipal social care  
15  
16 services. The municipalities are also usually responsible for providing home health care to the  
17  
18 elderly.[16] Their health care organizations include unlicensed assistant nurses,  
19  
20 physiotherapists and occupational therapists, with registered nurses (RNs) providing the  
21  
22 highest medical competence. The RNs have the overall responsibility for medication  
23  
24 management and delivery of specialized health care in patient homes and consequently visit  
25  
26 each patient less frequently than the unlicensed staff. When physician resources are necessary,  
27  
28 they are usually provided by primary care physicians, but hospital physicians may also  
29  
30 become involved. All physicians are employed by the county councils.  
31  
32  
33  
34  
35

36 Home health care records are generally computerized. There are many different  
37  
38 journal systems used in home health care in Sweden and the documentation routines, as well  
39  
40 as access to these systems (read and write permissions), vary. Documentation from one  
41  
42 caregiver, such as home health care, is not always accessible to health care professionals in  
43  
44 other settings, such as staff at a hospital. As patients receiving home health care may be  
45  
46 receiving care from several organizations simultaneously, we found it important to include all  
47  
48 AEs documented in the home health care notes, irrespective of origin.  
49  
50

### 51 52 **Definitions**

53  
54 In this study, an AE was defined as suffering, physical or psychological harm, illness or death  
55  
56 caused by health care or social care that was not an inevitable consequence of the patient's  
57  
58  
59

1  
2 condition or an expected effect of the treatment received by the patient because of her/his  
3  
4 condition. A preventable AE was defined as an event that could have been prevented if  
5  
6 adequate measures and/or actions had been taken during the patient's contact with health care  
7  
8 or social care. This definition is based on the terminology in the Swedish Patient Safety  
9  
10 Act.[17] AEs related to both acts of omission and acts of commission were included.  
11  
12

### 13 14 **Study sample, inclusion and exclusion criteria**

15  
16 Ten review teams from different sites across Sweden were recruited using a convenience  
17  
18 sampling strategy, invitations through personal contacts or by e-mail via a national patient  
19  
20 safety network. All review teams interested in participation were included. Seven teams were  
21  
22 organized within municipalities and three teams were employed by county councils. The  
23  
24 teams consisted of one to three RNs and one or two physicians. They all had long experience  
25  
26 of working as RNs or physicians, and in the home health care context.  
27  
28  
29

30  
31 After approval from the regional ethical board, a random sample of 600 home health  
32  
33 care records was reviewed during the period February to August 2016. All patients 18 years  
34  
35 or older admitted to home health care during 2015 at the review sites were eligible for  
36  
37 inclusion. The review included the period from admission (index admission) up to a  
38  
39 maximum of 90 days after admission. If a patient was discharged from home health care and  
40  
41 was readmitted within the 90-day period, the review of that patient continued. To be included  
42  
43 as an AE in the study, one of the following criteria had to be met:  
44  
45

- 46 1. The AE occurred during the index admission, that is, within 90 days after admission in  
47  
48 home health care, regardless of caregiver.  
49
- 50 2. The AE derived from caregivers outside home health care (outpatient care, social care or  
51  
52 in-hospital care), occurred within 30 days prior to the index admission and was detected  
53  
54 during the index admission.  
55  
56  
57  
58  
59  
60

1  
2 Randomization of records was performed by one of the authors (MU), using an online  
3  
4 randomizer, to ensure it was carried out in the same way for all review teams. Oversampling  
5  
6 was carried out with ten records per team. If a patient in the random sample was receiving  
7  
8 limited home health care once or twice a week, for example only blood pressure measurement  
9  
10 or delivery of pre-dispensed drugs, this patient was replaced by another random admission.  
11  
12 AEs that gave symptoms more than 90 days after the index admission or that occurred were  
13  
14 detected and for which treatment was completed before the index admission were excluded.  
15  
16  
17  
18  
19

### 20 **Education of the review teams**

21  
22 To ensure result validity and reliability, the review process was standardized in a written  
23  
24 project manual, where the definitions and the inclusion and exclusion criteria were also  
25  
26 included. A trigger manual was used, including trigger definitions and preventability decision  
27  
28 support, as well as detailed examples that were discussed by the review teams before the  
29  
30 study began. The team members underwent a mandatory one-day education in the trigger tool  
31  
32 methodology. Discussions were held to reach consensus about definitions, exclusion and  
33  
34 inclusion criteria, interpretation and application of the triggers, assessment of AEs and  
35  
36 preventability, as well as how to use the two cases report forms. During the process of  
37  
38 familiarization with the methodology, each member of the review team independently  
39  
40 reviewed six training records in order to achieve reliable reviews. This was followed by a  
41  
42 consensus process with all teams including discussions regarding trigger outcome,  
43  
44 assessments of AEs and preventability.  
45  
46  
47  
48  
49

### 50 **Review process**

51  
52 The review was performed in two stages. In most teams, the RNs carried out both primary and  
53  
54 secondary reviews and later discussed the findings with the physicians. In some teams, the  
55  
56 physicians carried out some of the primary as well as the secondary reviews.  
57  
58  
59  
60

In the primary review stage, the reviewers screened all records for the presence of 38 predefined triggers categorized into four modules (Table 1). A trigger is an indicator suggesting that an AE might have occurred during the inclusion period. For each trigger detected, the reviewer determined whether or not the trigger reflected the presence of a potential AE. Only records with triggers indicating a potential AE went forward to the secondary review stage. The reviewers also recorded demographic data. Starting from the index admission to home health care, a maximum of 90 days was reviewed. There was no time restriction for the review of each record in this stage. To ensure inter-rater reliability, 10% of the records in the primary review process were reviewed by a second reviewer. Inter-rater reliability was assessed based on the reviewers' judgements regarding whether a record should be forwarded to secondary review. Discussions about individual judgements were held and when consensus was reached, the records were ready for the secondary review stage.

**Table 1** List of triggers

|                   |                                                                                       |
|-------------------|---------------------------------------------------------------------------------------|
| Care module       | Cardiac arrest and/or deterioration in vital signs                                    |
|                   | Deep venous thrombosis and/or pulmonary embolus                                       |
|                   | Pressure ulcer                                                                        |
|                   | Blood vessel, skin and/or tissue harm                                                 |
|                   | Neurological impairment and/or harm                                                   |
|                   | Fall                                                                                  |
|                   | Health care-associated infection                                                      |
|                   | Moderate/severe pain                                                                  |
|                   | Moderate/severe worry, anxiety, suffering, existential pain and/or psychological pain |
|                   | Moderate/severe agitation and/or acute confusion/delirium                             |
|                   | Undernutrition                                                                        |
|                   | Insufficient oral health                                                              |
|                   | Moderate/severe gastrointestinal problem                                              |
|                   | Distended urinary bladder                                                             |
|                   | Deviation from normal course after invasive/surgical treatment                        |
|                   | Treatment                                                                             |
|                   | Advanced medical device                                                               |
|                   | Threats, violence and/or improper contact                                             |
|                   | Self-inflicted harm                                                                   |
|                   | Escape from home/special accommodation                                                |
|                   | Documentation of mistake or dissatisfaction with care                                 |
|                   | Other                                                                                 |
| Laboratory module | Abnormal glucose value                                                                |

|    |                                  |                                                                                           |
|----|----------------------------------|-------------------------------------------------------------------------------------------|
| 1  |                                  |                                                                                           |
| 2  |                                  | Increasing creatinine value                                                               |
| 3  |                                  | Abnormal potassium value                                                                  |
| 4  |                                  | Abnormal sodium value                                                                     |
| 5  |                                  | Abnormal calcium value                                                                    |
| 6  |                                  |                                                                                           |
| 7  | Medication module                | Adverse drug event/adverse drug reaction                                                  |
| 8  |                                  | Drug that requires follow-up with blood sampling                                          |
| 9  |                                  | Treatment with at least 10 drugs                                                          |
| 10 |                                  | Absence of in-depth drug review                                                           |
| 11 |                                  | Treatment with drugs that increase the risk for haemorrhage                               |
| 12 |                                  | Drug management                                                                           |
| 13 |                                  |                                                                                           |
| 14 | Continuity and transition module | Unplanned change of care-providing unit                                                   |
| 15 |                                  | Unplanned contact with physician and/or registered nurse                                  |
| 16 |                                  | Absence of and/or deviation from care plan                                                |
| 17 |                                  | Absence of a coordinated individual care plan when care is provided by several caregivers |
| 18 |                                  | Documentation related to insufficient coordination of care, communication and/or          |
| 19 |                                  | information                                                                               |
| 20 |                                  |                                                                                           |

In the secondary review stage, each potential AE was scrutinized individually. To qualify as an AE, a score of three or higher on a 4-point Likert scale was required (1, the event was not related to health care/social care; 2, the event was probably not related to health care/social care; 3, the event was probably related to health care/social care; 4, the event was related to health care/social care). The reviewer made a judgement whether or not the event qualified as an AE. If it did, the AE was marked for further assessment. The preventability of an AE was judged on a similar 4-point scale: 1, the AE was not preventable; 2, the AE was probably not preventable; 3, the AE was probably preventable; 4, the AE was preventable.[5] In the following, probably preventable (grade 3) and preventable (grade 4) AEs are referred to as preventable AEs.

The severity of harm was evaluated using two different scales. The first was the National Coordinating Council for Medication Error Reporting and Prevention (NCC MERP) Index,[18] which is used in the Global Trigger Tool.[14] NCC MERP Index categories E–I were included, i.e., those relating to harm (grade E, contributed to or resulted in temporary harm; grade F, contributed to or resulted in temporary harm to the patient and required outpatient, home health or hospital care, or prolonged hospitalization or extended the period of home health care; grade G, contributed to or resulted in permanent patient harm; grade H,

1  
2 lifesaving intervention required within 60 minutes; grade I, contributed to the patient's death).  
3  
4 The second severity scale was that used in the Harvard Medical Practice Study (HMPS)[19]  
5  
6 and subsequently in several nationwide AE studies. It encompasses seven grades (minimal  
7  
8 impairment, recovery within 1 month; moderate impairment, recovery within 1–6 months;  
9  
10 moderate impairment, recovery within 6–12 months; permanent impairment, degree of  
11  
12 disability  $\leq 50\%$ ; permanent impairment, degree of disability  $> 50\%$ ; contributed to patient  
13  
14 death; unable to determine). All reviewers also documented, e.g., the types of AEs, as well as  
15  
16 information on the origin of each AE (home health care, inpatient care, outpatient care or  
17  
18 social care).  
19  
20  
21

22  
23 Access to various parts of the patients' medical records differed between review  
24  
25 teams. Municipalities and county councils sometimes have separate medical record systems.  
26  
27 Accordingly, some municipal review teams had to request physicians' notes and laboratory  
28  
29 values, for example, because these were stored in their county council's record system.  
30  
31

32  
33 All review teams were supported by record review experts in the research group who  
34  
35 could answer questions; one expert (MU) monitored all reviews from the primary and  
36  
37 secondary review stages for completeness and adherence to the trigger definitions and project  
38  
39 manual. Any questions or discrepancies were referred back to the relevant team for resolution.  
40  
41

## 42 **Data analysis**

43  
44 Data are presented as median (range), mean (SD) (95% CI) or number (percent). We  
45  
46 calculated the cumulative incidence of AEs over the review period. Comparisons between  
47  
48 groups were made using the Mann-Whitney U test or the chi-squared test, as appropriate. A p  
49  
50 value  $< 0.05$  was considered significant. Agreement between reviewers was analysed using  $\kappa$   
51  
52 statistics. All statistical calculations were performed using Statistica 64 version 13 (StatSoft,  
53  
54 Oklahoma, USA).  
55  
56  
57  
58  
59  
60

## RESULTS

A total of 600 patient records from home health care were reviewed; 280 of the patients were men, median age 79 years (range, 20–97 years), and 320 were women, median age 82 years (range, 29–99 years). The number of days reviewed was 40,735 in total, with a median of 90 days per patient. Depending on patient discharge or death, the range of days reviewed varied between 1 and 90. Demographic data are shown in Table 2.

**Table 2** Demographic data

| Parameter                                                | Value                   |
|----------------------------------------------------------|-------------------------|
| Men/women, n (%)                                         | 280 (46.7) / 320 (53.3) |
| Age in years, median (range)                             | 80.5 (20–99)            |
| Reviewed days, median (range)                            | 90 (1–90)               |
| Referral to home health care from                        |                         |
| Hospital care, n (%)                                     | 300 (50.0)              |
| Outpatient care, n (%)                                   | 212 (35.3)              |
| Not possible to determine, n (%)                         | 88 (14.7)               |
| Medical diagnosis at home health care admission*         |                         |
| Malignancy, n (%)                                        | 253 (42.2)              |
| Cardiovascular disease, n (%)                            | 119 (19.8)              |
| Confusion, dementia, n (%)                               | 102 (17.0)              |
| Diabetes, n (%)                                          | 51 (8.5)                |
| Skin wound, pressure ulcer, n (%)                        | 38 (6.3)                |
| Stroke, n (%)                                            | 36 (6.0)                |
| Pulmonary disease, n (%)                                 | 35 (5.8)                |
| Neurological disease, n (%)                              | 33 (5.5)                |
| Medical needs at home health care admission†             |                         |
| Medication assistance, n (%)                             | 233 (38.8)              |
| Palliative care, n (%)                                   | 144 (24.0)              |
| Activities of daily living, n (%)                        | 111 (18.5)              |
| Laboratory sampling, n (%)                               | 88 (14.7)               |
| Wound care, assistance with compression stockings, n (%) | 74 (12.3)               |
| Assistance with advanced medical devices, n (%)          | 62 (10.3)               |
| Rehabilitation, home modifications, means testing, n (%) | 51 (8.5)                |
| Pain relief, n (%)                                       | 39 (6.5)                |
| Social situation at home health care admission           |                         |
| Patient's own home, lives alone, n (%)                   | 265 (44.2)              |
| Patient's own home, cohabiting, n (%)                    | 257 (42.8)              |
| Home for medical health care, assistance 24/7, n (%)     | 50 (8.3)                |
| Not possible to determine, n (%)                         | 28 (4.7)                |

\*Medical diagnosis affecting > 5% of patients. A patient could have several diagnoses.

†Medical needs for > 5% of patients. A patient could have several medical needs.

The inter-rater reliability of the reviewers' judgements concerning if a record was to be forwarded to secondary review was  $\kappa = 0.801$  (substantial).



Through the home health care records, 356 AEs were identified, affecting 226 patients (37.7 %; 95% CI 33.0–42.8). This corresponds to a median of 1 (range, 1–7) AE per patient affected (Table 3). Most were considered preventable (255, 71.6 %; 95% CI 63.2–80.8). There was no difference in the incidence of AEs between men and women ( $p = 0.72$ ), or between patients aged 80 years or older and younger patients ( $p = 0.12$ ) (data not shown).

**Table 3** Adverse events (AEs) detected in patients receiving home health care classified by origin (n = 600)

|                                                               | Home health care      | Care outside home health care | Total                 |
|---------------------------------------------------------------|-----------------------|-------------------------------|-----------------------|
| Number of AEs                                                 | 271                   | 85                            | 356                   |
| Number of patients affected by AEs (%; 95% CI)                | 182 (30.3; 26.2–35.0) | 67 (11.2; 8.7–14.1)           | 226 (37.7; 33.0–42.8) |
| Median number of AEs per affected patient (range)             | 1 (1–5)               | 1 (1–4)                       | 1 (1–7)               |
| Number of preventable AEs                                     | 194                   | 61                            | 255                   |
| Number of patients affected by preventable AEs (%; 95% CI)    | 137 (22.8; 19.2–26.9) | 50 (8.3; 6.3–10.9)            | 174 (29.0; 24.9–33.6) |
| Median number of preventable AEs per affected patient (range) | 1 (1–4)               | 1 (1–4)                       | 1 (1–5)               |
| Number of patients with > 1 AE (%; 95% CI)                    | 62 (10.3; 8.0–13.2)   | 12 (2.0; 1.1–3.4)             | 83 (13.8; 11.1–17.1)  |
| Number of patients with > 1 preventable AE (%; 95% CI)        | 39 (6.5; 4.7–8.8)     | 8 (1.3; 0.6–2.5)              | 54 (9.0; 6.8–11.6)    |
| Number of AEs per 100 patients                                | 45.2                  | 14.2                          | 59.3                  |
| Number of preventable AEs per 100 patients                    | 32.3                  | 10.2                          | 42.5                  |
| Number of AEs per 1,000 patient days                          | 6.7                   | 2.1                           | 8.7                   |
| Number of preventable AEs per 1,000 patient days              | 4.8                   | 1.5                           | 6.3                   |

Of the AEs, 271 (76.1 %; 95% CI 67.5–85.6) were related to home health care, 44 (12.4 %; 95% CI 9.1–16.4) to in-hospital care, 23 (6.5 %; 95% CI 4.2–9.5) to social care and 12 (3.4 %; 95% CI 1.8–5.7) to outpatient care. It was not possible to determine from the documentation where the remaining 6 (1.7%; 95% CI 0.7–3.5) AEs had originated. There was no difference in preventability ( $p = 0.97$ ) between AEs originating in home health care or outside home health care (data not shown).

On the NCC MERP scale, 102 (28.6%; 95% CI 23.5–34.6) of all AEs resulted in temporary harm to the patient and 246 (69.1 %; 95% CI 60.9–78.2) in temporary harm that required extra health care visits or a prolonged care period. The HMPS scale showed that 213 (59.8%; 95% CI 52.2–68.3) of all AEs were minor with recovery within 1 month (Table 4). When comparing AEs originating in home health care and care given to the patients outside

1  
2 home health care, NCCP MERP revealed no difference in severity ( $p = 0.64$ ), but the HMPS  
3  
4 classification did ( $p = 0.027$ ). When AEs for which severity could not be determined were  
5  
6 excluded, this difference no longer remained ( $p = 0.07$ ).  
7  
8  
9  
10  
11  
12  
13  
14  
15  
16  
17  
18  
19  
20  
21  
22  
23  
24  
25  
26  
27  
28  
29  
30  
31  
32  
33  
34  
35  
36  
37  
38  
39  
40  
41  
42  
43  
44  
45  
46  
47  
48  
49  
50  
51  
52  
53  
54  
55  
56  
57  
58  
59  
60

**Table 4** Severity of adverse events (AEs) detected in patients receiving home health care classified by origin

| Severity category                                                                                                                                                                           | In home health care   |                               | Care outside home health care |                               | Total                 |                               |
|---------------------------------------------------------------------------------------------------------------------------------------------------------------------------------------------|-----------------------|-------------------------------|-------------------------------|-------------------------------|-----------------------|-------------------------------|
|                                                                                                                                                                                             | AE, n (%; 95% CI)     | Preventable AE, n (%; 95% CI) | AE, n (%; 95% CI)             | Preventable AE, n (%; 95% CI) | AE, n (%; 95% CI)     | Preventable AE, n (%; 95% CI) |
| <b>Severity category according to NCCP MERP index</b>                                                                                                                                       |                       |                               |                               |                               |                       |                               |
| E Contributed to or resulted in temporary harm                                                                                                                                              | 78 (28.8; 22.9–35.7)  | 50 (64.1; 48.1–83.8)          | 24 (28.2; 18.5–41.4)          | 14 (58.3; 33.2–95.6)          | 102 (28.6; 23.5–34.6) | 64 (62.7; 48.7–79.6)          |
| F Contributed to or resulted in temporary harm to the patient and required outpatient, home health or hospital care, or prolonged hospitalization or an extended period of home health care | 187 (69.0; 59.6–79.4) | 142 (75.9; 64.2–89.2)         | 59 (69.4; 53.3–88.9)          | 45 (76.3; 56.3–101.2)         | 246 (69.1; 60.9–78.2) | 187 (76.0; 65.7–87.5)         |
| G Contributed to or resulted in permanent patient harm                                                                                                                                      | 3 (1.1; 0.3–3.0)      | 1 (33.3; 1.7–164.4)           | 2 (2.4; 3.9–7.8)              | 2 (100; 167.7–330.4)          | 5 (1.4; 0.5–3.1)      | 3 (60.0; 15.3–163.3)          |
| H Lifesaving intervention required within 60 minutes                                                                                                                                        | 0 (0)                 | 0 (0)                         | 0 (0)                         | 0 (0)                         | 0 (0)                 | 0 (0)                         |
| I Contributed to patient's death                                                                                                                                                            | 3 (1.1; 0.3–3.0)      | 1 (33.3; 1.7–164.4)           | 0 (0)                         | 0 (0)                         | 3 (0.8; 0.2–2.3)      | 1 (33.3; 1.7–164.4)           |
| Total                                                                                                                                                                                       | 271 (100)             | 194 (71.6; 62.0–82.2)         | 85 (100)                      | 61 (71.8; 55.4–91.6)          | 356 (100)             | 255 (71.6; 63.2–80.8)         |
| <b>Severity category according to HMPS scale</b>                                                                                                                                            |                       |                               |                               |                               |                       |                               |
| Minimal impairment, recovery within 1 month                                                                                                                                                 | 171 (63.1; 54.2–73.1) | 118 (69.0; 57.4–82.3)         | 42 (49.4; 36.1–66.2)          | 31 (73.8; 51.0–103.5)         | 213 (59.8; 52.2–68.3) | 149 (69.9; 59.4–81.9)         |
| Moderate impairment, recovery within 1–6 months                                                                                                                                             | 57 (21.0; 16.1–27.0)  | 44 (77.2; 56.8–102.7)         | 26 (30.6; 20.4–44.2)          | 19 (73.1; 45.3–112.0)         | 83 (23.3; 18.7–28.8)  | 63 (75.9; 58.8–96.5)          |
| Moderate impairment, recovery within 6–12 months                                                                                                                                            | 14 (5.2; 2.9–8.5)     | 11 (78.6; 41.3–136.6)         | 1 (1.2; 0.1–5.8)              | 0 (0)                         | 15 (4.2; 2.5–6.8)     | 11 (73.3; 38.6–127.5)         |
| Permanent impairment, degree of disability ≤ 50%                                                                                                                                            | 3 (1.1; 0.3–3.0)      | 1 (33.3; 1.7–164.4)           | 2 (2.4; 0.4–7.8)              | 2 (100; 167.7–330.4)          | 5 (1.4; 0.5–3.1)      | 3 (60.0; 15.3–163.3)          |
| Permanent impairment, degree of disability > 50%                                                                                                                                            | 0 (0)                 | 0 (0)                         | 0 (0)                         | 0 (0)                         | 0 (0)                 | 0 (0)                         |
| Contributed to patient death                                                                                                                                                                | 3 (1.1; 0.3–3.0)      | 1 (33.3; 1.7–164.4)           | 0 (0)                         | 0 (0)                         | 3 (0.8; 0.2–2.3)      | 1 (33.3; 1.7–164.4)           |
| Unable to determine                                                                                                                                                                         | 23 (8.5; 5.5–12.5)    | 19 (82.6; 51.2–126.6)         | 14 (16.5; 9.4–27.0)           | 9 (64.3; 31.4–118.0)          | 37 (10.4; 7.4–14.2)   | 28 (75.7; 51.3–107.9)         |
| Total                                                                                                                                                                                       | 271 (100)             | 194 (71.6; 62.0–82.2)         | 85 (100)                      | 61 (71.8; 55.4–91.6)          | 356 (100)             | 255 (71.6; 63.2–80.8)         |

NCCP MERP, National Coordinating Council for Medication Error Reporting and Prevention. HMPS, Harvard Medical Practice Study.

**Table 5** Types of adverse events (AEs) detected in patients receiving home health care, the origin and the proportion of preventable AEs

| Type of AE                             | Home health care, AEs<br>n (%; 95% CI) | Care outside home health care, AEs<br>n (%; 95% CI) | Total, AEs<br>n (%; 95% CI) | Total preventable AEs,<br>n (%; 95% CI) |
|----------------------------------------|----------------------------------------|-----------------------------------------------------|-----------------------------|-----------------------------------------|
| Health care-associated infections      | 59 (21.8; 16.7–27.9)                   | 13 (15.3; 8.5–25.5)                                 | 72 (20.2; 15.9–25.3)        | 46 (63.9; 47.3–84.5)                    |
| Oral candida                           | 12 (25.4)                              | 1 (7.7)                                             | 13 (18.1)                   | 6 (46.1)                                |
| Urinary tract infection                | 9 (15.2)                               | 2 (15.4)                                            | 11 (15.3)                   | 8 (72.7)                                |
| Pneumonia                              | 10 (16.9)                              | 1 (7.7)                                             | 11 (15.3)                   | 8 (72.7)                                |
| Wound infection                        | 9 (15.2)                               | 3 (23.1)                                            | 12 (16.6)                   | 12 (100.0)                              |
| Sepsis                                 | 5 (8.5)                                | 1 (7.7)                                             | 6 (8.3)                     | 1 (16.7)                                |
| Skin candida                           | 5 (8.5)                                | 1 (7.7)                                             | 6 (8.3)                     | 6 (100.0)                               |
| Others                                 | 9 (15.2)                               | 4 (30.8)                                            | 13 (18.1)                   | 5 (38.5)                                |
| Falls                                  | 51 (18.8; 14.2–24.6)                   | 15 (17.6; 10.2–28.4)                                | 66 (18.5; 14.4–23.4)        | 29 (43.9; 30.0–62.3)                    |
| Fracture                               | 7 (13.7)                               | 4 (26.7)                                            | 11 (16.7)                   | 6 (54.5)                                |
| Skin wound                             | 33 (64.7)                              | 7 (46.7)                                            | 40 (60.6)                   | 14 (35.0)                               |
| Pain                                   | 11 (21.6)                              | 3 (30.0)                                            | 14 (21.2)                   | 8 (57.1)                                |
| Not specified                          | 0 (0)                                  | 1 (6.7)                                             | 1 (1.5)                     | 1 (100.0)                               |
| Pressure ulcers                        | 46 (17.0; 12.6–22.4)                   | 16 (18.8; 11.1–29.9)                                | 62 (17.4; 13.5–22.2)        | 52 (83.9; 63.3–109.1)                   |
| Category 1                             | 20 (43.5)                              | 4 (25.0)                                            | 24 (38.7)                   | 21 (87.5)                               |
| Category 2                             | 17 (37.0)                              | 8 (50.0)                                            | 25 (40.3)                   | 19 (76.0)                               |
| Category 3                             | 3 (6.5)                                | 2 (12.5)                                            | 5 (8.0)                     | 4 (80.0)                                |
| Category 4                             | 2 (4.3)                                | 0 (0)                                               | 2 (3.2)                     | 2 (100.0)                               |
| Category unknown                       | 4 (8.7)                                | 2 (12.5)                                            | 6 (9.7)                     | 6 (100.0)                               |
| Skin, vessel or tissue harm            | 25 (9.2; 6.1–13.4)                     | 8 (9.4; 4.4–17.9)                                   | 33 (9.3; 6.5–12.9)          | 27 (81.8; 55.0–117.4)                   |
| Skin harm                              | 18 (72.0)                              | 4 (25.0)                                            | 22 (66.7)                   | 18 (81.8)                               |
| Vessel harm                            | 4 (16.0)                               | 1 (12.5)                                            | 5 (15.2)                    | 3 (80.0)                                |
| Tissue harm                            | 3 (12.0)                               | 3 (37.5)                                            | 6 (18.2)                    | 6 (100.0)                               |
| Pain                                   | 17 (6.3; 3.8–9.8)                      | 6 (7.1; 2.9–14.7)                                   | 23 (6.5; 4.2–9.5)           | 21 (91.3; 58.0–137.2)                   |
| Psychological harm                     | 12 (4.4; 2.4–7.5)                      | 6 (7.1; 2.9–14.7)                                   | 18 (5.1; 3.1–7.8)           | 14 (77.8; 44.3–127.4)                   |
| Other                                  | 10 (3.7; 1.9–6.6)                      | 1 (1.2; 0.1–5.8)                                    | 11 (3.1; 1.6–5.4)           | 10 (90.1; 46.2–162.0)                   |
| Neurological harm                      | 7 (2.6; 1.1–5.1)                       | 3 (3.5; 0.9–9.6)                                    | 10 (2.8; 1.4–5.0)           | 9 (90.0; 43.9–165.2)                    |
| Haemorrhage (not related to surgery)   | 7 (2.6; 1.1–5.1)                       | 3 (3.5; 0.9–9.6)                                    | 10 (2.8; 1.4–5.0)           | 4 (40.0; 12.7–96.5)                     |
| Failure in vital signs                 | 7 (2.6; 1.1–5.1)                       | 3 (3.5; 0.9–9.6)                                    | 10 (2.8; 1.4–5.0)           | 9 (90.0; 43.9–165.2)                    |
| Weight loss, nutrition-related AE      | 5 (1.8; 0.7–4.1)                       | 3 (3.5; 0.9–9.6)                                    | 8 (2.2; 1.0–4.3)            | 7 (87.5; 38.3–173.1)                    |
| General deterioration in health status | 7 (2.6; 1.1–5.1)                       | 0 (0)                                               | 7 (2.0; 0.9–3.9)            | 7 (100.0; 43.7–197.8)                   |
| Severe constipation                    | 5 (1.8; 0.7–4.1)                       | 0 (0)                                               | 5 (1.4; 0.5–3.1)            | 5 (100.0; 36.6–221.7)                   |
| Severe vomiting                        | 4 (1.5; 0.5–3.6)                       | 0 (0)                                               | 4 (1.1; 0.4–2.7)            | 3 (75.0; 19.1–204.1)                    |
| Affected laboratory values             | 3 (1.1; 0.3–3.0)                       | 1 (1.2; 0.1–5.8)                                    | 4 (1.1; 0.4–2.7)            | 4 (100.0; 31.8–241.2)                   |
| Allergic reaction                      | 1 (0.4; 0.0–1.8)                       | 2 (2.4; 0.4–7.8)                                    | 3 (0.8; 0.2–2.3)            | 1 (33.3; 1.7–164.4)                     |
| Severe diarrhoea                       | 1 (0.4; 0.0–1.8)                       | 2 (2.4; 0.4–7.8)                                    | 3 (0.8; 0.2–2.3)            | 1 (33.3; 1.7–164.4)                     |
| Distended urinary bladder              | 2 (0.7; 0.1–2.4)                       | 2 (2.4; 0.4–7.8)                                    | 4 (1.2; 0.4–2.7)            | 4 (100.0; 31.8–241.2)                   |
| Dehydration                            | 1 (0.4; 0.0–1.8)                       | 1 (1.2; 0.1–5.8)                                    | 2 (0.6; 0.1–1.9)            | 1 (50.0; 2.5–246.6)                     |
| Attempted suicide                      | 1 (0.4; 0.0–1.8)                       | 0 (0)                                               | 1 (0.3; 0.0–1.4)            | 1 (100.0; 5.0–493.2)                    |
| Total                                  | 271 (100.0)                            | 85 (100.0)                                          | 356 (100.0)                 | 255 (71.6; 63.2–80.8)                   |

The most common types of AEs were health care-associated infections, falls and pressure ulcers (Table 5). There were no differences in the number of such AEs between men and women or between patients aged 80 years or older and younger patients (data not shown). The

1 probability of falls being preventable was 43.9%; 95% CI 30.0–62.3, whereas the majority of  
2  
3 the other types of AEs were considered preventable to a greater extent. There was no  
4  
5 difference in the type of AEs between those originating in home health care and those from  
6  
7 care given outside home health care ( $p = 0.52$ ).  
8  
9

10  
11 Forty-one (18.1%) of the AEs in the home health care setting required a median of one  
12 (range, 1–5) additional physician visit(s) in the outpatient setting, 40 (14.8 %) required a  
13 median of 1 (range, 1–9) additional physician visit(s) in the home health care setting and 37  
14 (13.7%) required hospital care for a median of 6 days (range, 1–41 days). There were no  
15 significant differences compared with AEs outside home health care: 7 (8.2%) (median, 1;  
16 range, 1–2) required additional physician visit(s) in the outpatient setting; 11 (12.9%)  
17 (median, 1; range, 1–11) required additional physician visit(s) in the home health care setting;  
18 13 (15.3%) required hospital care for a median of 7 days (range, 2–10 days).  
19  
20  
21  
22  
23  
24  
25  
26  
27  
28  
29

## 30 **DISCUSSION**

31  
32 This study is the first to assess AEs in patients receiving home health care across different  
33 parts of Sweden through the use of retrospective record review. Our main findings are that  
34 AEs affect over a third of these patients, are deemed to be mostly preventable and result in  
35 temporary harm to the patient requiring extra health care resources. One fourth of the AEs  
36 detected in home health care originated in other health care settings. We found no differences  
37 in the types of AEs, or their severity or preventability, depending on origin.  
38  
39  
40  
41  
42  
43  
44  
45  
46

47 There are few studies investigating AEs in home health care with which to compare  
48 our findings. The incidence of AEs, 37.7%, is much higher than the 4–13% reported by other  
49 studies.[8, 9, 10, 11] It is difficult to compare the rates, as the differences may be due to  
50 varying services, patient characteristics, and methods of record review, as well as the  
51 definition of an AE and the inclusion criteria used. It is also difficult to compare the rates for  
52 the home health care setting with in-hospital AE rates, because the home health care provider  
53  
54  
55  
56  
57  
58  
59  
60

1  
2 may not continuously observe the patients and the health care environment. The majority of  
3  
4 the identified AEs were minor and transient. In a comparison of serious AEs (recovery within  
5  
6 6–12 months, permanent disability or death) by recalculating their respective prevalence,  
7  
8 there seem to be no obvious differences between our study and an earlier Swedish in-hospital  
9  
10 study or Canadian home health care.[1, 8]  
11  
12

13  
14 Patients receiving home health care are often old and frail and frequently have  
15  
16 concomitant contact with multiple caregivers. We have shown that almost 25% of AEs found  
17  
18 in patients in home health care originated in care given in other settings. AEs such as pressure  
19  
20 ulcers or infections impose an additional burden on the home health care organization with its  
21  
22 limited access to RNs and physicians. This finding also highlights the importance of passing  
23  
24 knowledge about AEs between caregivers. The findings imply that all sections of health care  
25  
26 should be aware of these most common AEs and preventive measures that can be taken along  
27  
28 a patient's health care journey.  
29  
30

31  
32 Almost three out of four AEs, regardless of origin, were judged by the review teams in  
33  
34 our study to be preventable. This is higher than the 33–56% previously reported in the home  
35  
36 health care setting,[8, 9] but is in line with many hospital record reviews.[1, 5, 6, 20] Risk  
37  
38 reduction in patient homes is not directly transferable from hospital care. The possibility of  
39  
40 conflict between patient autonomy and safety should be considered in the home care setting.  
41  
42 Patients are the hosts of the care environment and supervision from health care personnel is  
43  
44 mostly limited to short visits. Preventive safety measures in a patient's home require true  
45  
46 patient involvement, taking the patient's values and integrity into consideration. For instance,  
47  
48 removing carpets to prevent falls, one of the AEs with the lowest preventability ratings must  
49  
50 be weighed against a patient's own wishes.  
51  
52

53  
54 Our findings of health care-associated infections, falls, pressure ulcers and skin  
55  
56 breakdown as the most common AEs are largely consistent with a Canadian review of 1,200  
57  
58

1 records from 2009–2010, which reported falls, wound infections, psychosocial, behavioural  
2 or mental health problems, or medication-related AEs as the most prominent findings.[9] We  
3 chose to not to use “medication-related AEs” as a separate AE group, since we regarded  
4 medication as a cause of AEs. Medication-caused AEs can be found among for example falls,  
5 severe constipation and oral candida. Other studies also report injurious falls as the most  
6 common AE in home health care.[11, 21] Decline in physical function is a prevalent safety  
7 risk.[10] Falls are also associated with increased risk of admission to long-term care and  
8 death.[11] This emphasizes the need to find effective strategies for prevention of falls.  
9 Preventive strategies for pressure ulcers and skin breakdown [8] also need to be identified.  
10 Patients in home health care may have several well-known risk factors for pressure ulcers. In  
11 one study, one tenth of AEs in patients receiving home health care fell into the category  
12 general decline.[8] The aging patient is at risk for weight loss and malnutrition. Doran et  
13 al.[10] noted that unintended weight loss accounted for 10% of the safety problems in home  
14 health care. Patients receiving home health care are often affected by cancer, where weight  
15 loss is a well-known problem.[10,22] Routines for the prevention of weight loss are  
16 important. Interventions can include energy- and protein-rich food, food with a particular  
17 texture, artificial nutrition, information about eating habits and checking the patient’s weight  
18 on a regular basis.[23]

19  
20  
21  
22  
23  
24  
25  
26  
27  
28  
29  
30  
31  
32  
33  
34  
35  
36  
37  
38  
39  
40  
41  
42 Health care-associated infections are common in both home health care and hospital  
43 care.[1, 24] Falls and pressure ulcers are also common in hospitalized patients. However, the  
44 types of AEs in home health care differ from that in hospital care in other aspects.  
45  
46 Surgical/procedural AEs and distended urinary bladder are more common in hospital care.[1,  
47 6, 20, 25, 26]

48  
49  
50  
51  
52  
53 We found that more than half of the AEs caused minimal impairment, with recovery  
54 within 1 month. This is in contrast to the findings of Sears et al.,[8] where one quarter of the  
55 AEs caused slight impairment and half resulted in moderate to serious impairment or death.  
56  
57  
58  
59

1  
2 One explanation for the difference could be that we found three times more AEs and probably  
3 included less severe AEs. Sears et al.[8] only included AEs that required the use of additional  
4 health care resources. Interventions in connection with AEs are a resource-consuming burden  
5 to health care. In order to get a broader and more proactive approach to patient safety, we  
6 found it important to include AEs that caused temporary harm without requiring extra visits or  
7 a prolonged health care period. The HMPS scale seemed less suitable than the NCC MERP  
8 scale in evaluating AE severity. Approximately one in ten AEs could not be characterized  
9 using the former scale.  
10  
11  
12  
13  
14  
15  
16  
17  
18  
19

20 We chose to review a period up to a maximum of 90 days from the start of a randomly  
21 chosen home health care period and included all AEs regardless of caregiver. If a patient was  
22 hospitalized and returned to home health care during that period, we included the new home  
23 health care period(s). The Institute for Healthcare Improvement has developed a trigger tool  
24 for skilled nursing facilities recommending that only the first 30 days of an admission are  
25 reviewed.[27] Blais et al.[9] included a period of up to 12 months preceding discharge for  
26 review and also included a 6-month period after discharge from the index admission. There is  
27 no consensus regarding which triggers to use in different settings.[28] The same applies for  
28 reporting of AE rates, as well as characterization of AEs, which makes comparisons difficult.  
29 As demand for home health care and interest in home health care safety increase, reliable and  
30 validated safety tools are warranted.  
31  
32  
33  
34  
35  
36  
37  
38  
39  
40  
41  
42  
43  
44

45 The strengths of this study include having ten teams from different parts of Sweden to  
46 review 600 records, which served to give an overview of AEs occurring in home health care  
47 settings. In accordance with the Global Trigger Tool methodology and as patients receiving  
48 home health care sometimes need parallel interventions from caregivers outside home health  
49 care, we chose a broader perspective on patient safety and included all AEs that occurred  
50 and/or were detected during the 90-day review period. We modified our definition based on  
51 NCC MERP classification E to include all AEs that resulted in temporary harm to the patient,  
52  
53  
54  
55  
56  
57  
58  
59  
60



1  
2 regardless of whether an intervention was documented or not. We regard this as an  
3  
4 improvement from a patient perspective, as it contributes to the identification of risk areas. To  
5  
6 adapt to the patient perspective and visualize the extra resources required due to AEs, we also  
7  
8 expanded NCC MERP classification F to include extra visits within home health care and  
9  
10 outpatient care. This study also has a number of limitations. We did not use a stratified sample  
11  
12 of records for all patients receiving home health care in Sweden. As the review was a part of  
13  
14 the development and validation of a trigger tool suited for home health care, we aimed for  
15  
16 review teams with an interest in patient safety. The 600 records were randomised from the ten  
17  
18 sites and gave an overview of AEs occurring in home health care. As this study forms a basis  
19  
20 for a national trigger tool for home health care, we aimed for richer review material and  
21  
22 limited inclusion by excluding records from patients receiving very sparse and infrequent  
23  
24 home health care. This exclusion criterion was defined using examples only. In any study  
25  
26 based on record review, only AEs that are noted in the record can be found. Generalizability  
27  
28 may be limited if home health care services have differing clinical standards.  
29  
30  
31

## 32 33 **CONCLUSIONS**

34  
35  
36 AEs in patients receiving home health care are common, mostly preventable and often result  
37  
38 in temporary harm that requires extra health care resources. As in hospital care, health care-  
39  
40 associated infections, falls and pressure ulcers are common AEs. The latter two are even more  
41  
42 common in home health care, as is harm to skin, vessels and tissue. This implies that we must  
43  
44 address and reduce these AEs through improvements identified in collaborations between  
45  
46 professionals. This is an important area for future studies.  
47  
48  
49

## 50 51 **Funding**

52  
53  
54 Financial support was provided through FORSS (No 470161) - Medical Research Council  
55  
56 of Southeast Sweden and the Region Östergötland (LiO-537211). The funders have neither  
57  
58  
59

1  
2 been involved in any part of the study, nor in writing the manuscript or the decision to  
3  
4 submit the manuscript for publication.  
5  
6  
7

## 8 **Competing interests**

9  
10  
11 The authors declare that they have no competing interests.  
12  
13

## 14 **Ethics approval**

15  
16  
17 Ethical permission was obtained from the Regional Ethical Board of Linköping University,  
18  
19 Sweden (No 2014/150-31).  
20  
21  
22  
23

## 24 **Contributors**

25  
26  
27 KS, MU, ME, ML and LN designed and conducted the study. KS, MU and LN undertook the  
28  
29 initial interpretation of the data, which was followed by discussions between all the authors.  
30  
31

32 All authors drafted the manuscript and were part of the revision process. All authors agreed to  
33  
34 the final version of the manuscript before submission.  
35  
36  
37  
38  
39

## 40 **Data sharing statement**

41  
42  
43 No additional data are available.  
44  
45  
46  
47  
48  
49  
50  
51  
52  
53  
54  
55  
56  
57  
58  
59  
60

## REFERENCES

1. Soop M, Fryksmark U, Köster M, et al. The incidence of adverse events in Swedish hospitals: a retrospective medical record review study. *Int J Qual Health Care* 2009;21:285–91.
2. von Plessen C, Kodal AM, Anhoj J. Experiences with global trigger tool reviews in five Danish hospitals: an implementation study. *BMJ Open*;2:1–8.
3. Resar RK, Rozich JD, Simmonds T, et al. A trigger tool to identify adverse events in the intensive care unit. *Jt Comm J Qual Patient Saf* 2006;32:585–90.
4. Kaafarani HM, Rosen AK, Nebeker JR, et al. Development of trigger tools for surveillance of adverse events in ambulatory surgery. *Qual Saf Health Care* 2010;19:425–9.
5. Unbeck M, Lindemalm S, Nydert P, et al. Validation of triggers and development of a pediatric trigger tool to identify adverse events. *BMC Health Serv Res* 2014;14:655.
6. Nilsson L, Risberg MB, Montgomery A, et al. Preventable adverse events in surgical care in Sweden: a nationwide review of patient notes. *Medicine (Baltimore)* 2016;95:e3047.
7. Mattsson TO, Knudsen JL, Lauritsen J, et al. Assessment of the global trigger tool to measure, monitor and evaluate patient safety in cancer patients: reliability concerns are raised. *BMJ Qual Saf* 2013;22:571–9.
8. Sears N, Baker GR, Barnsley J, et al. The incidence of adverse events among home care patients. *Int J Qual Health Care* 2013;25:16–28.
9. Blais R, Sears NA, Doran D, et al. Assessing adverse events among home care clients in three Canadian provinces using chart review. *BMJ Qual Saf* 2013;22:989–97.

- 1  
2  
3  
4  
5  
6  
7  
8  
9  
10  
11  
12  
13  
14  
15  
16  
17  
18  
19  
20  
21  
22  
23  
24  
25  
26  
27  
28  
29  
30  
31  
32  
33  
34  
35  
36  
37  
38  
39  
40  
41  
42  
43  
44  
45  
46  
47  
48  
49  
50  
51  
52  
53  
54  
55  
56  
57  
58  
59  
60
10. Doran DM, Hirdes JP, Blais R, et al. The nature of safety problems among Canadian homecare clients: evidence from the RAI-HC reporting system. *J Nurs Manage* 2009;17:165–74.
  11. Doran DM, Hirdes JP, Blais R, et al. Adverse events among Ontario home care clients associated with emergency room visit or hospitalization: a retrospective cohort study. *BMC Health Serv Res* 2013;13:227.
  12. Madigan E. A description of adverse events in home healthcare. *Home Healthc Nurse* 2007;25:191–7.
  13. Classen DC, Resar R, Griffin F, et al. Global Trigger Tool’ shows that adverse events in hospitals may be ten times greater than previously measured. *Health Affairs* 2011;30:581–9.
  14. Griffin F, Resar R. IHI Global Trigger Tool for Measuring Adverse Events. 2nd ed. Cambridge, MA: Institute for Healthcare Improvement; 2009.
  15. Lindblad M, Schildmeijer K, Nilsson L, et al. Development and validation of a trigger tool to identify adverse events and no-harm incidents that affect patients admitted to home healthcare. *BMJ Qual and Saf*. Accepted 25 Aug 2017.
  16. Anell A, Glenngård AH, Merkur S. Sweden: health system review. *Health Syst Transit* 2012;14:1–159.
  17. SFS 2010:659. Patientsäkerhetslagen [Patient Safety Act]. 2010. Stockholm: Riksdagen. [https://www.riksdagen.se/sv/dokument-lagar/dokument/svensk-forfattningssamling/patientsakerhetslag-2010659\\_sfs-2010-659](https://www.riksdagen.se/sv/dokument-lagar/dokument/svensk-forfattningssamling/patientsakerhetslag-2010659_sfs-2010-659) (accessed Mar 20 2017).
  18. NCC MERP; <http://www.nccmerp.org/sites/default/files/indexBW2001-06-12.pdf> (accessed Sept 26 2017).

- 1  
2  
3  
4  
5  
6  
7  
8  
9  
10  
11  
12  
13  
14  
15  
16  
17  
18  
19  
20  
21  
22  
23  
24  
25  
26  
27  
28  
29  
30  
31  
32  
33  
34  
35  
36  
37  
38  
39  
40  
41  
42  
43  
44  
45  
46  
47  
48  
49  
50  
51  
52  
53  
54  
55  
56  
57  
58  
59  
60
19. Brennan TA, Leape LL, Laird NM, et al. Incidence of adverse events and negligence in hospitalized patients. Results of the Harvard Medical Practice Study I. *N Engl J Med* 1991;324:370–6.
20. Kennerly DA, Saldana M, Kudyakov R, et al. Description and evaluation of adaption to the Global Trigger Tool to enhance value to adverse event reduction efforts. *J Patient Saf* 2013;9:87–95.
21. Johnson K. Adverse events among Winnipeg Home Care clients. *Healthc Q* 2006;9 Spec No:127–34.
22. Tisdale MJ. Cachexia in cancer patients. *Nat Rev Cancer* 2002;2:862–71.
23. Alibhai SMH, Greenwood C, Payette H. An approach to the management of unintentional weight loss in elderly people. *CMAJ* 2005;172:773–80.
24. Deilkås ET, Bukholm G, Lindstrom JC, et al. Monitoring adverse events in Norwegian hospitals from 2010 to 2013. *BMJ Open* 2015;5:e008576.
25. Unbeck M, Muren O, Lillkrona U. Identification of adverse events at an orthopedics department in Sweden. *Acta Orthop* 2008;79:396–403.
26. Unbeck M, Dalen N, Muren O, Lillkrona U, Härenstam KP. Healthcare processes must be improved to reduce the occurrence of orthopaedic adverse events. *Scand J Caring Sci* 2010;24(4):671-7. doi: 10.1111/j.1471-6712.2009.00760.x.
27. Adler L, Moore J, Federico F. IHI Skilled Nursing Facility Trigger Tool for Measuring Adverse Events. Cambridge, MA: Institute for Healthcare Improvement; 2015.  
<http://www.ihl.org/resources/Pages/Tools/SkilledNursingFacilityTriggerTool.aspx>  
(accessed Dec 30 2016).
28. Hibbert PD, Molloy CJ, Hooper TD, et al. The application of the Global Trigger Tool: a systematic review. *Int J Qual Health Care* 2016;28:640–9.

## STROBE Statement

|                              | Page No | Recommendation                                                                                                                                                                                                                                                                                                                                                                                                                                                                                                                                                                                                                                                                                   |
|------------------------------|---------|--------------------------------------------------------------------------------------------------------------------------------------------------------------------------------------------------------------------------------------------------------------------------------------------------------------------------------------------------------------------------------------------------------------------------------------------------------------------------------------------------------------------------------------------------------------------------------------------------------------------------------------------------------------------------------------------------|
| <b>Title and abstract</b>    | 1-2     | (a) Indicate the study's design with a commonly used term in the title or the abstract<br>(b) Provide in the abstract an informative and balanced summary of what was done and what was found                                                                                                                                                                                                                                                                                                                                                                                                                                                                                                    |
| <b>Introduction</b>          |         |                                                                                                                                                                                                                                                                                                                                                                                                                                                                                                                                                                                                                                                                                                  |
| Background/rationale         | 4       | Explain the scientific background and rationale for the investigation being reported                                                                                                                                                                                                                                                                                                                                                                                                                                                                                                                                                                                                             |
| Objectives                   | 5       | State specific objectives, including any prespecified hypotheses                                                                                                                                                                                                                                                                                                                                                                                                                                                                                                                                                                                                                                 |
| <b>Methods</b>               |         |                                                                                                                                                                                                                                                                                                                                                                                                                                                                                                                                                                                                                                                                                                  |
| Study design                 | 5       | Present key elements of study design early in the paper                                                                                                                                                                                                                                                                                                                                                                                                                                                                                                                                                                                                                                          |
| Setting                      | 5       | Describe the setting, locations, and relevant dates, including periods of recruitment, exposure, follow-up, and data collection                                                                                                                                                                                                                                                                                                                                                                                                                                                                                                                                                                  |
| Participants                 | 6-7     | (a) <i>Cohort study</i> —Give the eligibility criteria, and the sources and methods of selection of participants. Describe methods of follow-up<br><i>Case-control study</i> —Give the eligibility criteria, and the sources and methods of case ascertainment and control selection. Give the rationale for the choice of cases and controls<br><i>Cross-sectional study</i> —Give the eligibility criteria, and the sources and methods of selection of participants<br>(b) <i>Cohort study</i> —For matched studies, give matching criteria and number of exposed and unexposed<br><i>Case-control study</i> —For matched studies, give matching criteria and the number of controls per case |
| Variables                    | 8-10    | Clearly define all outcomes, exposures, predictors, potential confounders, and effect modifiers. Give diagnostic criteria, if applicable                                                                                                                                                                                                                                                                                                                                                                                                                                                                                                                                                         |
| Data sources/<br>measurement | 6       | For each variable of interest, give sources of data and details of methods of assessment (measurement). Describe comparability of assessment methods if there is more than one group                                                                                                                                                                                                                                                                                                                                                                                                                                                                                                             |
| Bias                         |         | Describe any efforts to address potential sources of bias                                                                                                                                                                                                                                                                                                                                                                                                                                                                                                                                                                                                                                        |
| Study size                   | 6       | Explain how the study size was arrived at                                                                                                                                                                                                                                                                                                                                                                                                                                                                                                                                                                                                                                                        |
| Quantitative variables       | 10      | Explain how quantitative variables were handled in the analyses. If applicable, describe which groupings were chosen and why                                                                                                                                                                                                                                                                                                                                                                                                                                                                                                                                                                     |
| Statistical methods          | 10      | (a) Describe all statistical methods, including those used to control for confounding<br>(b) Describe any methods used to examine subgroups and interactions<br>(c) Explain how missing data were addressed<br>(d) <i>Cohort study</i> —If applicable, explain how loss to follow-up was addressed<br><i>Case-control study</i> —If applicable, explain how matching of cases and controls was addressed<br><i>Cross-sectional study</i> —If applicable, describe analytical methods taking account of sampling strategy<br>(e) Describe any sensitivity analyses                                                                                                                                |

Continued on next page

**Results**

|                  |       |                                                                                                                                                                                                                                                                                                                                                                                                               |
|------------------|-------|---------------------------------------------------------------------------------------------------------------------------------------------------------------------------------------------------------------------------------------------------------------------------------------------------------------------------------------------------------------------------------------------------------------|
| Participants     | 11    | (a) Report numbers of individuals at each stage of study—eg numbers potentially eligible, examined for eligibility, confirmed eligible, included in the study, completing follow-up, and analysed<br>(b) Give reasons for non-participation at each stage<br>(c) Consider use of a flow diagram                                                                                                               |
| Descriptive data | 11    | (a) Give characteristics of study participants (eg demographic, clinical, social) and information on exposures and potential confounders<br>(b) Indicate number of participants with missing data for each variable of interest<br>(c) <i>Cohort study</i> —Summarise follow-up time (eg, average and total amount)                                                                                           |
| Outcome data     | 12    | <i>Cohort study</i> —Report numbers of outcome events or summary measures over time<br><i>Case-control study</i> —Report numbers in each exposure category, or summary measures of exposure<br><i>Cross-sectional study</i> —Report numbers of outcome events or summary measures                                                                                                                             |
| Main results     | 12-15 | (a) Give unadjusted estimates and, if applicable, confounder-adjusted estimates and their precision (eg, 95% confidence interval). Make clear which confounders were adjusted for and why they were included<br>(b) Report category boundaries when continuous variables were categorized<br>(c) If relevant, consider translating estimates of relative risk into absolute risk for a meaningful time period |
| Other analyses   |       | Report other analyses done—eg analyses of subgroups and interactions, and sensitivity analyses                                                                                                                                                                                                                                                                                                                |

**Discussion**

|                  |       |                                                                                                                                                                            |
|------------------|-------|----------------------------------------------------------------------------------------------------------------------------------------------------------------------------|
| Key results      | 16-19 | Summarise key results with reference to study objectives                                                                                                                   |
| Limitations      | 20    | Discuss limitations of the study, taking into account sources of potential bias or imprecision. Discuss both direction and magnitude of any potential bias                 |
| Interpretation   | 20    | Give a cautious overall interpretation of results considering objectives, limitations, multiplicity of analyses, results from similar studies, and other relevant evidence |
| Generalisability | 20    | Discuss the generalisability (external validity) of the study results                                                                                                      |

**Other information**

|         |    |                                                                                                                                                               |
|---------|----|---------------------------------------------------------------------------------------------------------------------------------------------------------------|
| Funding | 21 | Give the source of funding and the role of the funders for the present study and, if applicable, for the original study on which the present article is based |
|---------|----|---------------------------------------------------------------------------------------------------------------------------------------------------------------|

# BMJ Open

## Adverse events in patients in home health care: a retrospective record review using trigger tool methodology

|                                 |                                                                                                                                                                                                                                                                                                                                                                                                                                                                                                                                                                                                                      |
|---------------------------------|----------------------------------------------------------------------------------------------------------------------------------------------------------------------------------------------------------------------------------------------------------------------------------------------------------------------------------------------------------------------------------------------------------------------------------------------------------------------------------------------------------------------------------------------------------------------------------------------------------------------|
| Journal:                        | <i>BMJ Open</i>                                                                                                                                                                                                                                                                                                                                                                                                                                                                                                                                                                                                      |
| Manuscript ID                   | bmjopen-2017-019267.R2                                                                                                                                                                                                                                                                                                                                                                                                                                                                                                                                                                                               |
| Article Type:                   | Research                                                                                                                                                                                                                                                                                                                                                                                                                                                                                                                                                                                                             |
| Date Submitted by the Author:   | 24-Nov-2017                                                                                                                                                                                                                                                                                                                                                                                                                                                                                                                                                                                                          |
| Complete List of Authors:       | Schildmeijer, Kristina; School of Health and Caring Sciences, Linnaeus University<br>Unbeck, Maria; Karolinska Institutet, Department of Clinical Sciences at Danderyd Hospital, Division of Orthopaedics<br>Ekstedt, Mirjam; Karolinska Institutet, LIME; Linneuniversitet<br>Lindblad, Marlène; Kungliga Tekniska Hogskolan, School of Technology and Health; Karolinska Institutet, LIME<br>Nilsson, Lena; Division of Drug Research, Anesthesiology and Intensive Care, Department of Medical and Health Sciences, Faculty of Health Sciences, Linköping University, Department of Anesthesia and Intensive Care |
| <b>Primary Subject Heading</b>: | Health services research                                                                                                                                                                                                                                                                                                                                                                                                                                                                                                                                                                                             |
| Secondary Subject Heading:      | Medical management                                                                                                                                                                                                                                                                                                                                                                                                                                                                                                                                                                                                   |
| Keywords:                       | Quality in health care < HEALTH SERVICES ADMINISTRATION & MANAGEMENT, Health & safety < HEALTH SERVICES ADMINISTRATION & MANAGEMENT, Home health care, Patient safety, Trigger Tool, Patient harm                                                                                                                                                                                                                                                                                                                                                                                                                    |
|                                 |                                                                                                                                                                                                                                                                                                                                                                                                                                                                                                                                                                                                                      |

SCHOLARONE™  
Manuscripts



1  
2  
3 Adverse events in patients in home health care: a retrospective  
4  
5  
6 record review using trigger tool methodology  
7  
8  
9

10 Kristina Schildmeijer,<sup>1</sup> Maria Unbeck,<sup>2,3</sup> Mirjam Ekstedt,<sup>1,4</sup> Marlene Lindblad,<sup>5,6</sup>

11  
12 Lena Nilsson<sup>7</sup>  
13  
14

15 <sup>1</sup>Department of Health and Caring Sciences, Linnaeus University, Kalmar, Sweden  
16  
17

18 <sup>2</sup>Department of Orthopaedics, Danderyd Hospital, Stockholm, Sweden  
19  
20

21 <sup>3</sup>Department of Clinical Sciences, Danderyd Hospital, Karolinska Institutet, Stockholm,  
22  
23 Sweden  
24

25 <sup>4</sup>Department of Learning, Informatics, Management and Ethics, Karolinska Institutet,  
26  
27 Stockholm, Sweden  
28  
29

30 <sup>5</sup>Royal Institute of Technology, School of Technology and Health, Stockholm, Sweden  
31  
32

33 <sup>6</sup>Department of Health Care Sciences, Ersta Sköndal University College, Stockholm,  
34  
35 Sweden  
36

37 <sup>7</sup>Department of Anaesthesiology and Intensive Care, Department of Medical and Health  
38  
39 Sciences, Linköping University, Linköping, Sweden  
40  
41

42 \*Correspondence to: Kristina Schildmeijer; [kristina.schildmeijer@lnu.se](mailto:kristina.schildmeijer@lnu.se)  
43  
44

45 Word count: 3953  
46  
47  
48  
49  
50  
51  
52  
53  
54  
55  
56  
57  
58  
59  
60

## ABSTRACT

**Objective:** Home health care is an increasingly common part of health care. The patients are often aged, frail and have multiple diseases, and multiple caregivers are involved in their treatment. This study explores the origin, incidence, types and preventability of adverse events (AEs) that occur in patients receiving home health care.

**Design:** A study using retrospective record review and trigger tool methodology.

**Setting and methods:** Ten teams with experience of home health care from nine regions across Sweden reviewed home health care records in a two-stage procedure using 38 predefined triggers in four modules. A random sample of records from 600 patients (18 years or older) receiving home health care during 2015 were reviewed.

**Primary and secondary outcome measures:** The cumulative incidence of AEs found in patients receiving home health care; secondary measures were origin, types, severity of harm and preventability of the AEs.

**Results:** The patients were 20–79 years old, 280 men and 320 women. The review teams identified 356 AEs in 226 (37.7%; 95% CI 33.0–42.8) of the home health care records. Of these, 255 (71.6%; 95% CI 63.2–80.8) were assessed as being preventable, and most (246, 69.1%; 95% CI 60.9–78.2) required extra health care visits or led to a prolonged period of health care. Most of the AEs (271, 76.1%; 95% CI 67.5–85.6) originated in home health care; the rest were detected during home health care but were related to care outside home health care. The most common AEs were health care-associated infections, falls and pressure ulcers.

**Conclusions:** AEs in patients receiving home health care are common, mostly preventable and often cause temporary harm requiring extra health care resources. The most frequent types of AEs must be addressed and reduced through improvements in inter-professional collaboration. This is an important area for future studies.

**Keywords:** Home health care, Patients, Adverse events, Patient harm, Patient safety, Trigger tool

## Strengths and limitations of the study

- The review process was standardized and included a manual with detailed trigger definitions and preventability decision support.
- The review team members had long experience of home health care.
- Our recruitment of review teams was based on convenience sampling and did not enable review of a stratified sample of patients receiving home health care in Sweden.
- The results can only be generalized to facilities with similar organizations and clinical standards.

## BACKGROUND

Home health care is an increasingly common component of health care, as an alternative to hospitalization. It includes a variety of health care interventions. The purpose can be curative, supportive, palliative or rehabilitative. The incidence and types of adverse events (AEs) in the acute care hospital setting have been well-investigated in many countries and for several medical specialities.[1-7] Despite the challenges related to an aging population and citizens' demands to receive care at home, patient safety in home health care is rarely investigated.[8-12] Incidence rates of AEs of up to 13% have been reported in a Canadian context;[8, 11] falls and drug-related AEs are the most frequent.

Retrospective record review is commonly used to study patient harm using predefined triggers indicating potential AEs. More AEs are found through record review than through incident reporting systems.[13] One of the most frequently used methods for retrospective record review is the Global Trigger Tool,[14] which has been further adapted to suit different areas of health care.

The number of patients who are cared for in their homes is increasing. They are often aged, frail and have multiple diseases. Municipal home services provide assistance with activities in daily life, but medical and technical advances have also made it possible for advanced treatment of complex and long-term illnesses in patient homes. As the complexity of care increases, interaction between multiple professionals from different health care providers (i.e., home health care, primary care, specialist care and social care) is critical for patient safety. New risks arise if communication and coordination of care is deficient. Thus, there is a need to further explore safety issues for patients receiving home health care, taking into consideration the complexity of having multiple caregivers involved in treatment and care. We have developed and validated a trigger tool intended for this group of patients.[15]

1  
2 This study explores the origin, incidence, types and preventability of the AEs that occur in  
3  
4 patients receiving home health care.  
5

## 6 7 **METHODS**

### 8 9 10 **Study design**

11  
12 This study used a retrospective record review design and was part of a validation study to  
13  
14 validate the trigger tool for home healthcare settings.[15]  
15  
16

### 17 18 **Study setting**

19  
20 The study was set in Sweden, where assistance with activities in daily life is provided in  
21  
22 patient homes by unlicensed staff (e.g., assistant nurses) on behalf of the municipal social care  
23  
24 services. The municipalities are also usually responsible for providing home health care to the  
25  
26 elderly.[16] Their health care organizations include unlicensed assistant nurses,  
27  
28 physiotherapists and occupational therapists, with registered nurses (RNs) providing the  
29  
30 highest medical competence. The RNs have the overall responsibility for medication  
31  
32 management and delivery of specialized health care in patient homes and consequently visit  
33  
34 each patient less frequently than the unlicensed staff. When physician resources are necessary,  
35  
36 they are usually provided by primary care physicians, but hospital physicians may also  
37  
38 become involved. All physicians are employed by the county councils.  
39  
40  
41  
42

43  
44 Home health care records are generally computerized. There are many different  
45  
46 journal systems used in home health care in Sweden and the documentation routines, as well  
47  
48 as access to these systems (read and write permissions), vary. Documentation from one  
49  
50 caregiver, such as home health care, is not always accessible to health care professionals in  
51  
52 other settings, such as staff at a hospital. As patients receiving home health care may be  
53  
54 receiving care from several organizations simultaneously, we found it important to include all  
55  
56 AEs documented in the home health care notes, irrespective of origin.  
57  
58  
59  
60

## Definitions

In this study, an AE was defined as suffering, physical or psychological harm, illness or death caused by health care or social care that was not an inevitable consequence of the patient's condition or an expected effect of the treatment received by the patient because of her/his condition. A preventable AE was defined as an event that could have been prevented if adequate measures and/or actions had been taken during the patient's contact with health care or social care. This definition is based on the terminology in the Swedish Patient Safety Act.[17] AEs related to both acts of omission and acts of commission were included.

## Study sample, inclusion and exclusion criteria

Ten review teams from different sites across Sweden were recruited using a convenience sampling strategy, invitations through personal contacts or by e-mail via a national patient safety network. All review teams interested in participation were included. Seven teams were organized within municipalities and three teams were employed by county councils. The teams consisted of one to three RNs and one or two physicians. They all had long experience of working as RNs or physicians, and in the home health care context.

After approval from the regional ethical board, a random sample of 600 home health care records was reviewed during the period February to August 2016. All patients 18 years or older admitted to home health care during 2015 at the review sites were eligible for inclusion. The review included the period from admission (index admission) up to a maximum of 90 days after admission. If a patient was discharged from home health care and was readmitted within the 90-day period, the review of that patient continued. To be included as an AE in the study, one of the following criteria had to be met:

1. The AE occurred during the index admission, that is, within 90 days after admission in home health care, regardless of caregiver.

1  
2 2. The AE derived from caregivers outside home health care (outpatient care, social care or  
3  
4 in-hospital care), occurred within 30 days prior to the index admission and was detected  
5  
6 during the index admission.  
7

8  
9 Randomization of records was performed by one of the authors (MU), using an online  
10  
11 randomizer, to ensure it was carried out in the same way for all review teams. Oversampling  
12  
13 was carried out with ten records per team. If a patient in the random sample was receiving  
14  
15 limited home health care once or twice a week, for example only blood pressure measurement  
16  
17 or delivery of pre-dispensed drugs, this patient was replaced by another random admission.  
18  
19 AEs that gave symptoms more than 90 days after the index admission or that occurred were  
20  
21 detected and for which treatment was completed before the index admission were excluded.  
22  
23  
24  
25  
26  
27

### 28 **Education of the review teams**

29  
30 To ensure result validity and reliability, the review process was standardized in a written  
31  
32 project manual, where the definitions and the inclusion and exclusion criteria were also  
33  
34 included. A trigger manual was used, including trigger definitions and preventability decision  
35  
36 support, as well as detailed examples that were discussed by the review teams before the  
37  
38 study began. The team members underwent a mandatory one-day education in the trigger tool  
39  
40 methodology. Discussions were held to reach consensus about definitions, exclusion and  
41  
42 inclusion criteria, interpretation and application of the triggers, assessment of AEs and  
43  
44 preventability, as well as how to use the two cases report forms. During the process of  
45  
46 familiarization with the methodology, each member of the review team independently  
47  
48 reviewed six training records in order to achieve reliable reviews. This was followed by a  
49  
50 consensus process with all teams including discussions regarding trigger outcome,  
51  
52 assessments of AEs and preventability.  
53  
54  
55  
56  
57  
58  
59  
60

## Review process

The review was performed in two stages. In most teams, the RNs carried out both primary and secondary reviews and later discussed the findings with the physicians. In some teams, the physicians carried out some of the primary as well as the secondary reviews.

In the primary review stage, the reviewers screened all records from their respective own setting for the presence of 38 predefined triggers categorized into four modules (Table 1). A trigger is an indicator suggesting that an AE might have occurred during the inclusion period. For each trigger detected, the reviewer determined whether or not the trigger reflected the presence of a potential AE. Only records with triggers indicating a potential AE went forward to the secondary review stage. The reviewers also recorded demographic data. Starting from the index admission to home health care, a maximum of 90 days was reviewed. There was no time restriction for the review of each record in this stage. One reviewer carried out the primary review. To test inter-rater reliability, 10% of the records in the primary review process were reviewed by a second reviewer. Inter-rater reliability was assessed based on the reviewers' judgements regarding whether a record should be forwarded to secondary review. Discussions about individual judgements were held and when consensus was reached, the records were ready for the secondary review stage.

**Table 1** List of triggers

|             |                                                                                       |
|-------------|---------------------------------------------------------------------------------------|
| Care module | Cardiac arrest and/or deterioration in vital signs                                    |
|             | Deep venous thrombosis and/or pulmonary embolus                                       |
|             | Pressure ulcer                                                                        |
|             | Blood vessel, skin and/or tissue harm                                                 |
|             | Neurological impairment and/or harm                                                   |
|             | Fall                                                                                  |
|             | Health care-associated infection                                                      |
|             | Moderate/severe pain                                                                  |
|             | Moderate/severe worry, anxiety, suffering, existential pain and/or psychological pain |
|             | Moderate/severe agitation and/or acute confusion/delirium                             |
|             | Undernutrition                                                                        |
|             | Insufficient oral health                                                              |
|             | Moderate/severe gastrointestinal problem                                              |



|    |                                  |                                                                                              |
|----|----------------------------------|----------------------------------------------------------------------------------------------|
| 1  |                                  |                                                                                              |
| 2  |                                  | Distended urinary bladder                                                                    |
| 3  |                                  | Deviation from normal course after invasive/surgical treatment                               |
| 4  |                                  | Treatment                                                                                    |
| 5  |                                  | Advanced medical device                                                                      |
| 6  |                                  | Threats, violence and/or improper contact                                                    |
| 7  |                                  | Self-inflicted harm                                                                          |
| 8  |                                  | Escape from home/special accommodation                                                       |
| 9  |                                  | Documentation of mistake or dissatisfaction with care                                        |
| 10 |                                  | Other                                                                                        |
| 11 |                                  |                                                                                              |
| 12 | Laboratory module                | Abnormal glucose value                                                                       |
| 13 |                                  | Increasing creatinine value                                                                  |
| 14 |                                  | Abnormal potassium value                                                                     |
| 15 |                                  | Abnormal sodium value                                                                        |
| 16 |                                  | Abnormal calcium value                                                                       |
| 17 |                                  |                                                                                              |
| 18 | Medication module                | Adverse drug event/adverse drug reaction                                                     |
| 19 |                                  | Drug that requires follow-up with blood sampling                                             |
| 20 |                                  | Treatment with at least 10 drugs                                                             |
| 21 |                                  | Absence of in-depth drug review                                                              |
| 22 |                                  | Treatment with drugs that increase the risk for haemorrhage                                  |
| 23 |                                  | Drug management                                                                              |
| 24 |                                  |                                                                                              |
| 25 | Continuity and transition module | Unplanned change of care-providing unit                                                      |
| 26 |                                  | Unplanned contact with physician and/or registered nurse                                     |
| 27 |                                  | Absence of and/or deviation from care plan                                                   |
| 28 |                                  | Absence of a coordinated individual care plan when care is provided by several caregivers    |
| 29 |                                  | Documentation related to insufficient coordination of care, communication and/or information |
| 30 |                                  |                                                                                              |
| 31 |                                  |                                                                                              |
| 32 |                                  |                                                                                              |

In the secondary review stage, each potential AE was scrutinized individually by the review team. To qualify as an AE, a score of three or higher on a 4-point Likert scale was required (1, the event was not related to health care/social care; 2, the event was probably not related to health care/social care; 3, the event was probably related to health care/social care; 4, the event was related to health care/social care). The reviewer made a judgement whether or not the event qualified as an AE. If it did, the AE was marked for further assessment. The preventability of an AE was judged on a similar 4-point scale: 1, the AE was not preventable; 2, the AE was probably not preventable; 3, the AE was probably preventable; 4, the AE was preventable.[5] In the following, probably preventable (grade 3) and preventable (grade 4) AEs are referred to as preventable AEs.

The severity of harm was evaluated using two different scales. The first was the National Coordinating Council for Medication Error Reporting and Prevention (NCC MERP)

1  
2 Index,[18] which is used in the Global Trigger Tool.[14] NCC MERP Index categories E–I  
3  
4 were included, i.e., those relating to harm (grade E, contributed to or resulted in temporary  
5  
6 harm; grade F, contributed to or resulted in temporary harm to the patient and required  
7  
8 outpatient, home health or hospital care, or prolonged hospitalization or extended the period  
9  
10 of home health care; grade G, contributed to or resulted in permanent patient harm; grade H,  
11  
12 lifesaving intervention required within 60 minutes; grade I, contributed to the patient’s death).  
13  
14 The second severity scale was that used in the Harvard Medical Practice Study (HMPS)[19]  
15  
16 and subsequently in several nationwide AE studies. It encompasses seven grades (minimal  
17  
18 impairment, recovery within 1 month; moderate impairment, recovery within 1–6 months;  
19  
20 moderate impairment, recovery within 6–12 months; permanent impairment, degree of  
21  
22 disability  $\leq 50\%$ ; permanent impairment, degree of disability  $> 50\%$ ; contributed to patient  
23  
24 death; unable to determine). All reviewers also documented, e.g., the type of AEs, as well as  
25  
26 information on the origin of each AE (home health care, inpatient care, outpatient care or  
27  
28 social care).  
29  
30  
31  
32

33 Access to various parts of the patients’ medical records differed between review  
34  
35 teams. Municipalities and county councils sometimes have separate medical record systems.  
36  
37 Accordingly, some municipal review teams had to request physicians’ notes and laboratory  
38  
39 values, for example, because these were stored in their county council’s record system.  
40  
41  
42

43 All review teams were supported by record review experts in the research group who  
44  
45 could answer questions. To ensure review quality one expert (MU) monitored all reviews  
46  
47 from the primary and secondary review stages for completeness and adherence to the trigger  
48  
49 and AE definitions, and project manual. Any questions or discrepancies were referred back to  
50  
51 the relevant team for resolution to make sure that the AE inclusion followed the project  
52  
53 manual.  
54  
55  
56  
57  
58  
59  
60

## Data analysis

Data are presented as median (range), mean (SD) (95% CI) or number (percent). We calculated the cumulative incidence of AEs over the review period. Comparisons between groups were made using the Mann-Whitney U test or the chi-squared test, as appropriate. A  $p$  value  $< 0.05$  was considered significant. Agreement between reviewers was analysed using  $\kappa$  statistics. All statistical calculations were performed using Statistica 64 version 13 (StatSoft, Oklahoma, USA).

## RESULTS

A total of 600 patient records from home health care were reviewed; 280 of the patients were men, median age 79 years (range, 20–97 years), and 320 were women, median age 82 years (range, 29–99 years). The number of days reviewed was 40,735 in total, with a median of 90 days per patient. Depending on patient discharge or death, the range of days reviewed varied between 1 and 90. Demographic data are shown in Table 2.

**Table 2** Demographic data

| Parameter                                                | Value                   |
|----------------------------------------------------------|-------------------------|
| Men/women, n (%)                                         | 280 (46.7) / 320 (53.3) |
| Age in years, median (range)                             | 80.5 (20–99)            |
| Reviewed days, median (range)                            | 90 (1–90)               |
| Referral to home health care from                        |                         |
| Hospital care, n (%)                                     | 300 (50.0)              |
| Outpatient care, n (%)                                   | 212 (35.3)              |
| Not possible to determine, n (%)                         | 88 (14.7)               |
| Medical diagnosis at home health care admission*         |                         |
| Malignancy, n (%)                                        | 253 (42.2)              |
| Cardiovascular disease, n (%)                            | 119 (19.8)              |
| Confusion, dementia, n (%)                               | 102 (17.0)              |
| Diabetes, n (%)                                          | 51 (8.5)                |
| Skin wound, pressure ulcer, n (%)                        | 38 (6.3)                |
| Stroke, n (%)                                            | 36 (6.0)                |
| Pulmonary disease, n (%)                                 | 35 (5.8)                |
| Neurological disease, n (%)                              | 33 (5.5)                |
| Medical needs at home health care admission†             |                         |
| Medication assistance, n (%)                             | 233 (38.8)              |
| Palliative care, n (%)                                   | 144 (24.0)              |
| Activities of daily living, n (%)                        | 111 (18.5)              |
| Laboratory sampling, n (%)                               | 88 (14.7)               |
| Wound care, assistance with compression stockings, n (%) | 74 (12.3)               |
| Assistance with advanced medical devices, n (%)          | 62 (10.3)               |
| Rehabilitation, home modifications, means testing, n (%) | 51 (8.5)                |
| Pain relief, n (%)                                       | 39 (6.5)                |
| Social situation at home health care admission           |                         |
| Patient's own home, lives alone, n (%)                   | 265 (44.2)              |

|                                                      |            |
|------------------------------------------------------|------------|
| Patient's own home, cohabiting, n (%)                | 257 (42.8) |
| Home for medical health care, assistance 24/7, n (%) | 50 (8.3)   |
| Not possible to determine, n (%)                     | 28 (4.7)   |

\*Medical diagnosis affecting > 5% of patients. A patient could have several diagnoses.

†Medical needs for > 5% of patients. A patient could have several medical needs.

The inter-rater reliability of the reviewers' judgements concerning if a record was to be forwarded to secondary review was  $\kappa = 0.801$  (substantial).

Through the home health care records, 356 AEs were identified, affecting 226 patients (37.7 %; 95% CI 33.0–42.8). This corresponds to a median of 1 (range, 1–7) AE per patient affected (Table 3). Most were considered preventable (255, 71.6 %; 95% CI 63.2–80.8). There was no difference in the incidence of AEs between men and women ( $p = 0.72$ ), or between patients aged 80 years or older and younger patients ( $p = 0.12$ ) (data not shown).

**Table 3** Adverse events (AEs) detected in patients receiving home health care classified by origin (n = 600)

|                                                               | Home health care      | Care outside home health care | Total                 |
|---------------------------------------------------------------|-----------------------|-------------------------------|-----------------------|
| Number of AEs                                                 | 271                   | 85                            | 356                   |
| Number of patients affected by AEs (%; 95% CI)                | 182 (30.3; 26.2–35.0) | 67 (11.2; 8.7–14.1)           | 226 (37.7; 33.0–42.8) |
| Median number of AEs per affected patient (range)             | 1 (1–5)               | 1 (1–4)                       | 1 (1–7)               |
| Number of preventable AEs                                     | 194                   | 61                            | 255                   |
| Number of patients affected by preventable AEs (%; 95% CI)    | 137 (22.8; 19.2–26.9) | 50 (8.3; 6.3–10.9)            | 174 (29.0; 24.9–33.6) |
| Median number of preventable AEs per affected patient (range) | 1 (1–4)               | 1 (1–4)                       | 1 (1–5)               |
| Number of patients with > 1 AE (%; 95% CI)                    | 62 (10.3; 8.0–13.2)   | 12 (2.0; 1.1–3.4)             | 83 (13.8; 11.1–17.1)  |
| Number of patients with > 1 preventable AE (%; 95% CI)        | 39 (6.5; 4.7–8.8)     | 8 (1.3; 0.6–2.5)              | 54 (9.0; 6.8–11.6)    |
| Number of AEs per 100 patients                                | 45.2                  | 14.2                          | 59.3                  |
| Number of preventable AEs per 100 patients                    | 32.3                  | 10.2                          | 42.5                  |
| Number of AEs per 1,000 patient days                          | 6.7                   | 2.1                           | 8.7                   |
| Number of preventable AEs per 1,000 patient days              | 4.8                   | 1.5                           | 6.3                   |

Of the AEs, 271 (76.1 %; 95% CI 67.5–85.6) were related to home health care, 44 (12.4 %; 95% CI 9.1–16.4) to in-hospital care, 23 (6.5 %; 95% CI 4.2–9.5) to social care and 12 (3.4 %; 95% CI 1.8–5.7) to outpatient care. It was not possible to determine from the documentation where the remaining 6 (1.7%; 95% CI 0.7–3.5) AEs had originated. There was

1  
2 no difference in preventability ( $p = 0.97$ ) between AEs originating in home health care or  
3  
4 outside home health care (data not shown).  
5  
6

7 On the NCC MERP scale, 102 (28.6%; 95% CI 23.5–34.6) of all AEs resulted in  
8  
9 temporary harm to the patient and 246 (69.1 %; 95% CI 60.9–78.2) in temporary harm that  
10  
11 required extra health care visits or a prolonged care period. The HMPS scale showed that 213  
12  
13 (59.8%; 95% CI 52.2–68.3) of all AEs were minor with recovery within 1 month (Table 4).  
14  
15  
16  
17  
18  
19  
20  
21  
22  
23  
24  
25  
26  
27  
28  
29  
30  
31  
32  
33  
34  
35  
36  
37  
38  
39  
40  
41  
42  
43  
44  
45  
46  
47  
48  
49  
50  
51  
52  
53  
54  
55  
56  
57  
58  
59  
60

**Table 4** Severity of adverse events (AEs) detected in patients receiving home health care classified by origin

| Severity category                                                                                                                                                                           | In home health care   |                               | Care outside home health care |                               | Total                 |                               |
|---------------------------------------------------------------------------------------------------------------------------------------------------------------------------------------------|-----------------------|-------------------------------|-------------------------------|-------------------------------|-----------------------|-------------------------------|
|                                                                                                                                                                                             | AE, n (%; 95% CI)     | Preventable AE, n (%; 95% CI) | AE, n (%; 95% CI)             | Preventable AE, n (%; 95% CI) | AE, n (%; 95% CI)     | Preventable AE, n (%; 95% CI) |
| <b>Severity category according to NCCP MERP index</b>                                                                                                                                       |                       |                               |                               |                               |                       |                               |
| E Contributed to or resulted in temporary harm                                                                                                                                              | 78 (28.8; 22.9–35.7)  | 50 (64.1; 48.1–83.8)          | 24 (28.2; 18.5–41.4)          | 14 (58.3; 33.2–95.6)          | 102 (28.6; 23.5–34.6) | 64 (62.7; 48.7–79.6)          |
| F Contributed to or resulted in temporary harm to the patient and required outpatient, home health or hospital care, or prolonged hospitalization or an extended period of home health care | 187 (69.0; 59.6–79.4) | 142 (75.9; 64.2–89.2)         | 59 (69.4; 53.3–88.9)          | 45 (76.3; 56.3–101.2)         | 246 (69.1; 60.9–78.2) | 187 (76.0; 65.7–87.5)         |
| G Contributed to or resulted in permanent patient harm                                                                                                                                      | 3 (1.1; 0.3–3.0)      | 1 (33.3; 1.7–164.4)           | 2 (2.4; 3.9–7.8)              | 2 (100; 167.7–330.4)          | 5 (1.4; 0.5–3.1)      | 3 (60.0; 15.3–163.3)          |
| H Lifesaving intervention required within 60 minutes                                                                                                                                        | 0 (0)                 | 0 (0)                         | 0 (0)                         | 0 (0)                         | 0 (0)                 | 0 (0)                         |
| I Contributed to patient's death                                                                                                                                                            | 3 (1.1; 0.3–3.0)      | 1 (33.3; 1.7–164.4)           | 0 (0)                         | 0 (0)                         | 3 (0.8; 0.2–2.3)      | 1 (33.3; 1.7–164.4)           |
| Total                                                                                                                                                                                       | 271 (100)             | 194 (71.6; 62.0–82.2)         | 85 (100)                      | 61 (71.8; 55.4–91.6)          | 356 (100)             | 255 (71.6; 63.2–80.8)         |
| <b>Severity category according to HMPS scale</b>                                                                                                                                            |                       |                               |                               |                               |                       |                               |
| Minimal impairment, recovery within 1 month                                                                                                                                                 | 171 (63.1; 54.2–73.1) | 118 (69.0; 57.4–82.3)         | 42 (49.4; 36.1–66.2)          | 31 (73.8; 51.0–103.5)         | 213 (59.8; 52.2–68.3) | 149 (69.9; 59.4–81.9)         |
| Moderate impairment, recovery within 1–6 months                                                                                                                                             | 57 (21.0; 16.1–27.0)  | 44 (77.2; 56.8–102.7)         | 26 (30.6; 20.4–44.2)          | 19 (73.1; 45.3–112.0)         | 83 (23.3; 18.7–28.8)  | 63 (75.9; 58.8–96.5)          |
| Moderate impairment, recovery within 6–12 months                                                                                                                                            | 14 (5.2; 2.9–8.5)     | 11 (78.6; 41.3–136.6)         | 1 (1.2; 0.1–5.8)              | 0 (0)                         | 15 (4.2; 2.5–6.8)     | 11 (73.3; 38.6–127.5)         |
| Permanent impairment, degree of disability ≤ 50%                                                                                                                                            | 3 (1.1; 0.3–3.0)      | 1 (33.3; 1.7–164.4)           | 2 (2.4; 0.4–7.8)              | 2 (100; 167.7–330.4)          | 5 (1.4; 0.5–3.1)      | 3 (60.0; 15.3–163.3)          |
| Permanent impairment, degree of disability > 50%                                                                                                                                            | 0 (0)                 | 0 (0)                         | 0 (0)                         | 0 (0)                         | 0 (0)                 | 0 (0)                         |
| Contributed to patient death                                                                                                                                                                | 3 (1.1; 0.3–3.0)      | 1 (33.3; 1.7–164.4)           | 0 (0)                         | 0 (0)                         | 3 (0.8; 0.2–2.3)      | 1 (33.3; 1.7–164.4)           |
| Unable to determine                                                                                                                                                                         | 23 (8.5; 5.5–12.5)    | 19 (82.6; 51.2–126.6)         | 14 (16.5; 9.4–27.0)           | 9 (64.3; 31.4–118.0)          | 37 (10.4; 7.4–14.2)   | 28 (75.7; 51.3–107.9)         |
| Total                                                                                                                                                                                       | 271 (100)             | 194 (71.6; 62.0–82.2)         | 85 (100)                      | 61 (71.8; 55.4–91.6)          | 356 (100)             | 255 (71.6; 63.2–80.8)         |

NCCP MERP, National Coordinating Council for Medication Error Reporting and Prevention. HMPS, Harvard Medical Practice Study.

**Table 5** Types of adverse events (AEs) detected in patients receiving home health care, the origin and the proportion of preventable AEs

| Type of AE                             | Home health care, AEs<br>n (%; 95% CI) | Care outside home health care, AEs<br>n (%; 95% CI) | Total, AEs<br>n (%; 95% CI) | Total preventable AEs,<br>n (%; 95% CI) |
|----------------------------------------|----------------------------------------|-----------------------------------------------------|-----------------------------|-----------------------------------------|
| Health care-associated infections      | 59 (21.8; 16.7–27.9)                   | 13 (15.3; 8.5–25.5)                                 | 72 (20.2; 15.9–25.3)        | 46 (63.9; 47.3–84.5)                    |
| Oral candida                           | 12 (25.4)                              | 1 (7.7)                                             | 13 (18.1)                   | 6 (46.1)                                |
| Urinary tract infection                | 9 (15.2)                               | 2 (15.4)                                            | 11 (15.3)                   | 8 (72.7)                                |
| Pneumonia                              | 10 (16.9)                              | 1 (7.7)                                             | 11 (15.3)                   | 8 (72.7)                                |
| Wound infection                        | 9 (15.2)                               | 3 (23.1)                                            | 12 (16.6)                   | 12 (100.0)                              |
| Sepsis                                 | 5 (8.5)                                | 1 (7.7)                                             | 6 (8.3)                     | 1 (16.7)                                |
| Skin candida                           | 5 (8.5)                                | 1 (7.7)                                             | 6 (8.3)                     | 6 (100.0)                               |
| Others                                 | 9 (15.2)                               | 4 (30.8)                                            | 13 (18.1)                   | 5 (38.5)                                |
| Falls                                  | 51 (18.8; 14.2–24.6)                   | 15 (17.6; 10.2–28.4)                                | 66 (18.5; 14.4–23.4)        | 29 (43.9; 30.0–62.3)                    |
| Fracture                               | 7 (13.7)                               | 4 (26.7)                                            | 11 (16.7)                   | 6 (54.5)                                |
| Skin wound                             | 33 (64.7)                              | 7 (46.7)                                            | 40 (60.6)                   | 14 (35.0)                               |
| Pain                                   | 11 (21.6)                              | 3 (30.0)                                            | 14 (21.2)                   | 8 (57.1)                                |
| Not specified                          | 0 (0)                                  | 1 (6.7)                                             | 1 (1.5)                     | 1 (100.0)                               |
| Pressure ulcers                        | 46 (17.0; 12.6–22.4)                   | 16 (18.8; 11.1–29.9)                                | 62 (17.4; 13.5–22.2)        | 52 (83.9; 63.3–109.1)                   |
| Category 1                             | 20 (43.5)                              | 4 (25.0)                                            | 24 (38.7)                   | 21 (87.5)                               |
| Category 2                             | 17 (37.0)                              | 8 (50.0)                                            | 25 (40.3)                   | 19 (76.0)                               |
| Category 3                             | 3 (6.5)                                | 2 (12.5)                                            | 5 (8.0)                     | 4 (80.0)                                |
| Category 4                             | 2 (4.3)                                | 0 (0)                                               | 2 (3.2)                     | 2 (100.0)                               |
| Category unknown                       | 4 (8.7)                                | 2 (12.5)                                            | 6 (9.7)                     | 6 (100.0)                               |
| Skin, vessel or tissue harm            | 25 (9.2; 6.1–13.4)                     | 8 (9.4; 4.4–17.9)                                   | 33 (9.3; 6.5–12.9)          | 27 (81.8; 55.0–117.4)                   |
| Skin harm                              | 18 (72.0)                              | 4 (25.0)                                            | 22 (66.7)                   | 18 (81.8)                               |
| Vessel harm                            | 4 (16.0)                               | 1 (12.5)                                            | 5 (15.2)                    | 3 (80.0)                                |
| Tissue harm                            | 3 (12.0)                               | 3 (37.5)                                            | 6 (18.2)                    | 6 (100.0)                               |
| Pain                                   | 17 (6.3; 3.8–9.8)                      | 6 (7.1; 2.9–14.7)                                   | 23 (6.5; 4.2–9.5)           | 21 (91.3; 58.0–137.2)                   |
| Psychological harm                     | 12 (4.4; 2.4–7.5)                      | 6 (7.1; 2.9–14.7)                                   | 18 (5.1; 3.1–7.8)           | 14 (77.8; 44.3–127.4)                   |
| Other                                  | 10 (3.7; 1.9–6.6)                      | 1 (1.2; 0.1–5.8)                                    | 11 (3.1; 1.6–5.4)           | 10 (90.1; 46.2–162.0)                   |
| Neurological harm                      | 7 (2.6; 1.1–5.1)                       | 3 (3.5; 0.9–9.6)                                    | 10 (2.8; 1.4–5.0)           | 9 (90.0; 43.9–165.2)                    |
| Haemorrhage (not related to surgery)   | 7 (2.6; 1.1–5.1)                       | 3 (3.5; 0.9–9.6)                                    | 10 (2.8; 1.4–5.0)           | 4 (40.0; 12.7–96.5)                     |
| Failure in vital signs                 | 7 (2.6; 1.1–5.1)                       | 3 (3.5; 0.9–9.6)                                    | 10 (2.8; 1.4–5.0)           | 9 (90.0; 43.9–165.2)                    |
| Weight loss, nutrition-related AE      | 5 (1.8; 0.7–4.1)                       | 3 (3.5; 0.9–9.6)                                    | 8 (2.2; 1.0–4.3)            | 7 (87.5; 38.3–173.1)                    |
| General deterioration in health status | 7 (2.6; 1.1–5.1)                       | 0 (0)                                               | 7 (2.0; 0.9–3.9)            | 7 (100.0; 43.7–197.8)                   |
| Severe constipation                    | 5 (1.8; 0.7–4.1)                       | 0 (0)                                               | 5 (1.4; 0.5–3.1)            | 5 (100.0; 36.6–221.7)                   |
| Severe vomiting                        | 4 (1.5; 0.5–3.6)                       | 0 (0)                                               | 4 (1.1; 0.4–2.7)            | 3 (75.0; 19.1–204.1)                    |
| Affected laboratory values             | 3 (1.1; 0.3–3.0)                       | 1 (1.2; 0.1–5.8)                                    | 4 (1.1; 0.4–2.7)            | 4 (100.0; 31.8–241.2)                   |
| Allergic reaction                      | 1 (0.4; 0.0–1.8)                       | 2 (2.4; 0.4–7.8)                                    | 3 (0.8; 0.2–2.3)            | 1 (33.3; 1.7–164.4)                     |
| Severe diarrhoea                       | 1 (0.4; 0.0–1.8)                       | 2 (2.4; 0.4–7.8)                                    | 3 (0.8; 0.2–2.3)            | 1 (33.3; 1.7–164.4)                     |
| Distended urinary bladder              | 2 (0.7; 0.1–2.4)                       | 2 (2.4; 0.4–7.8)                                    | 4 (1.2; 0.4–2.7)            | 4 (100.0; 31.8–241.2)                   |
| Dehydration                            | 1 (0.4; 0.0–1.8)                       | 1 (1.2; 0.1–5.8)                                    | 2 (0.6; 0.1–1.9)            | 1 (50.0; 2.5–246.6)                     |
| Attempted suicide                      | 1 (0.4; 0.0–1.8)                       | 0 (0)                                               | 1 (0.3; 0.0–1.4)            | 1 (100.0; 5.0–493.2)                    |
| Total                                  | 271 (100.0)                            | 85 (100.0)                                          | 356 (100.0)                 | 255 (71.6; 63.2–80.8)                   |

The most common types of AEs were health care-associated infections, falls and pressure ulcers (Table 5). There were no differences in the number of such AEs between men and women or between patients aged 80 years or older and younger patients (data not shown). The

1 probability of falls being preventable was 43.9%; 95% CI 30.0–62.3, whereas the majority of  
2 the other types of AEs were considered preventable to a greater extent. There was no  
3  
4 difference in the type of AEs between those originating in home health care and those from  
5  
6 care given outside home health care ( $p = 0.52$ ).  
7  
8  
9

10  
11 Forty-one (18.1%) of the AEs in the home health care setting required a median of one  
12 (range, 1–5) additional physician visit(s) in the outpatient setting, 40 (14.8 %) required a  
13 median of 1 (range, 1–9) additional physician visit(s) in the home health care setting and 37  
14 (13.7%) required hospital care for a median of 6 days (range, 1–41 days). There were no  
15 significant differences compared with AEs outside home health care: 7 (8.2%) (median, 1;  
16 range, 1–2) required additional physician visit(s) in the outpatient setting; 11 (12.9%)  
17 (median, 1; range, 1–11) required additional physician visit(s) in the home health care setting;  
18 13 (15.3%) required hospital care for a median of 7 days (range, 2–10 days).  
19  
20  
21  
22  
23  
24  
25  
26  
27  
28  
29

## 30 **DISCUSSION**

31  
32 This study is the first to assess AEs in patients receiving home health care across different  
33 parts of Sweden through the use of retrospective record review. Our main findings are that  
34 AEs affect over a third of these patients, are deemed to be mostly preventable and result in  
35 temporary harm to the patient requiring extra health care resources. One fourth of the AEs  
36 detected in home health care originated in other health care settings. We found no differences  
37 in the type of AEs, or their severity or preventability, depending on origin.  
38  
39  
40  
41  
42  
43  
44  
45  
46

47 There are few studies investigating AEs in home health care with which to compare  
48 our findings. The incidence of AEs, 37.7%, is much higher than the 4–13% reported by other  
49 studies.[8, 9, 10, 11] It is difficult to compare the rates, as the differences may be due to  
50 varying services, patient characteristics, and methods of record review, as well as the  
51 definition of an AE and the inclusion criteria used. It is also difficult to compare the rates for  
52 the home health care setting with in-hospital AE rates, because the home health care provider  
53  
54  
55  
56  
57  
58  
59  
60



1  
2 may not continuously observe the patients and the health care environment. The majority of  
3  
4 the identified AEs were minor and transient. In a comparison of serious AEs (recovery within  
5  
6 6–12 months, permanent disability or death) by recalculating their respective prevalence,  
7  
8 there seem to be no obvious differences between our study and an earlier Swedish in-hospital  
9  
10 study or Canadian home health care.[1, 8]  
11  
12

13  
14 Patients receiving home health care are often old and frail and frequently have  
15  
16 concomitant contact with multiple caregivers. We have shown that almost 25% of AEs found  
17  
18 in patients in home health care originated in care given in other settings. AEs such as pressure  
19  
20 ulcers or infections impose an additional burden on the home health care organization with its  
21  
22 limited access to RNs and physicians. This finding also highlights the importance of passing  
23  
24 knowledge about AEs between caregivers. The findings imply that all sections of health care  
25  
26 should be aware of these most common AEs and preventive measures that can be taken along  
27  
28 a patient's health care journey.  
29  
30

31  
32 Almost three out of four AEs, regardless of origin, were judged by the review teams in  
33  
34 our study to be preventable. This is higher than the 33–56% previously reported in the home  
35  
36 health care setting,[8, 9] but is in line with many hospital record reviews.[1, 5, 6, 20] Risk  
37  
38 reduction in patient homes is not directly transferable from hospital care. The possibility of  
39  
40 conflict between patient autonomy and safety should be considered in the home care setting.  
41  
42 Patients are the hosts of the care environment and supervision from health care personnel is  
43  
44 mostly limited to short visits. Preventive safety measures in a patient's home require true  
45  
46 patient involvement, taking the patient's values and integrity into consideration. For instance,  
47  
48 removing carpets to prevent falls, one of the AEs with the lowest preventability ratings must  
49  
50 be weighed against a patient's own wishes.  
51  
52

53  
54 Our findings of health care-associated infections, falls, pressure ulcers and skin  
55  
56 breakdown as the most common AEs are largely consistent with a Canadian review of 1,200  
57  
58

1 records from 2009–2010, which reported falls, wound infections, psychosocial, behavioural  
2 or mental health problems, or medication-related AEs as the most prominent findings.[9] We  
3 chose to not to use “medication-related AEs” as a separate AE group, since we regarded  
4 medication as a cause of AEs. Medication-caused AEs can be found among for example falls,  
5 severe constipation and oral candida. Other studies also report injurious falls as the most  
6 common AE in home health care.[11, 21] Decline in physical function is a prevalent safety  
7 risk.[10] Falls are also associated with increased risk of admission to long-term care and  
8 death.[11] This emphasizes the need to find effective strategies for prevention of falls.  
9 Preventive strategies for pressure ulcers and skin breakdown [8] also need to be identified.  
10 Patients in home health care may have several well-known risk factors for pressure ulcers. In  
11 one study, one tenth of AEs in patients receiving home health care fell into the category  
12 general decline.[8] The aging patient is at risk for weight loss and malnutrition. Doran et  
13 al.[10] noted that unintended weight loss accounted for 10% of the safety problems in home  
14 health care. Patients receiving home health care are often affected by cancer, where weight  
15 loss is a well-known problem.[10,22] Routines for the prevention of weight loss are  
16 important. Interventions can include energy- and protein-rich food, food with a particular  
17 texture, artificial nutrition, information about eating habits and checking the patient’s weight  
18 on a regular basis.[23]

19 Health care-associated infections are common in both home health care and hospital  
20 care.[1, 24] Falls and pressure ulcers are also common in hospitalized patients. However, the  
21 type of AEs in home health care differ from that in hospital care in other aspects.  
22 Surgical/procedural AEs and distended urinary bladder are more common in hospital care.[1,  
23 6, 21, 25, 26]

24 We found that more than half of the AEs caused minimal impairment, with recovery  
25 within 1 month. This is in contrast to the findings of Sears et al.,[8] where one quarter of the  
26 AEs caused slight impairment and half resulted in moderate to serious impairment or death.

1  
2 One explanation for the difference could be that we found three times more AEs and probably  
3 included less severe AEs. Sears et al.[8] only included AEs that required the use of additional  
4 health care resources. Interventions in connection with AEs are a resource-consuming burden  
5 to health care. In order to get a broader and more proactive approach to patient safety, we  
6 found it important to include AEs that caused temporary harm without requiring extra visits or  
7 a prolonged health care period.  
8  
9

10  
11 We chose to review a period up to a maximum of 90 days from the start of a randomly  
12 chosen home health care period and included all AEs regardless of caregiver. If a patient was  
13 hospitalized and returned to home health care during that period, we included the new home  
14 health care period(s). The Institute for Healthcare Improvement has developed a trigger tool  
15 for skilled nursing facilities recommending that only the first 30 days of an admission are  
16 reviewed.[27] Blais et al.[9] included a period of up to 12 months preceding discharge for  
17 review and also included a 6-month period after discharge from the index admission. There is  
18 no consensus regarding which triggers to use in different settings.[28] The same applies for  
19 reporting of AE rates, as well as characterization of AEs, which makes comparisons difficult.  
20 As demand for home health care and interest in home health care safety increase, reliable and  
21 validated safety tools are warranted.  
22  
23  
24  
25  
26  
27  
28  
29  
30  
31  
32  
33  
34  
35  
36  
37  
38  
39  
40

41 The strengths of this study include having ten teams from different parts of Sweden to  
42 review 600 records, which served to give an overview of AEs occurring in home health care  
43 settings. In accordance with the Global Trigger Tool methodology and as patients receiving  
44 home health care sometimes need parallel interventions from caregivers outside home health  
45 care, we chose a broader perspective on patient safety and included all AEs that occurred  
46 and/or were detected during the 90-day review period. We modified our definition based on  
47 NCC MERP classification E to include all AEs that resulted in temporary harm to the patient,  
48 regardless of whether an intervention was documented or not. We regard this as an  
49 improvement from a patient perspective, as it contributes to the identification of risk areas. To  
50  
51  
52  
53  
54  
55  
56  
57  
58  
59  
60

1  
2 adapt to the patient perspective and visualize the extra resources required due to AEs, we also  
3  
4 expanded NCC MERP classification F to include extra visits within home health care and  
5  
6 outpatient care. This study also has a number of limitations. We did not use a stratified sample  
7  
8 of records for all patients receiving home health care in Sweden. As the review was a part of  
9  
10 the development and validation of a trigger tool suited for home health care, we aimed for  
11  
12 review teams with an interest in patient safety. The 600 records were randomised from the ten  
13  
14 sites and gave an overview of AEs occurring in home health care. As this study was part of a  
15  
16 validation study and forms a basis for a national trigger tool for home health care, we aimed  
17  
18 for richer review material and limited inclusion by excluding records from patients receiving  
19  
20 very sparse and infrequent home health care. This exclusion criterion was defined using  
21  
22 examples only. Defining a minimum level of home health care services for inclusion to the  
23  
24 study would have been preferable. The review process had only two primary reviewers  
25  
26 reviewing the same sample in ten percent of the records. In any study based on record review,  
27  
28 only AEs that are noted in the record can be found. There is a risk of underreporting of AEs as  
29  
30 the reviewer teams screened records from their own setting. On the other hand, they could  
31  
32 have found more AEs as they have context information that is not stated in the record. Finally,  
33  
34 generalizability may be limited if home health care services have differing clinical standards.  
35  
36  
37  
38  
39

## 40 **CONCLUSIONS**

41  
42  
43 AEs in patients receiving home health care are common, mostly preventable and often result  
44  
45 in temporary harm that requires extra health care resources. As in hospital care, health care-  
46  
47 associated infections, falls and pressure ulcers are common AEs. The latter two are even more  
48  
49 common in home health care, as is harm to skin, vessels and tissue. This implies that we must  
50  
51 address and reduce these AEs through improvements identified in collaborations between  
52  
53 professionals. This is an important area for future studies.  
54  
55  
56  
57  
58  
59  
60

## **Funding**

Financial support was provided through FORSS (No 470161) - Medical Research Council of Southeast Sweden and the Region Östergötland (LiO-537211). The funders have neither been involved in any part of the study, nor in writing the manuscript or the decision to submit the manuscript for publication.

## **Competing interests**

The authors declare that they have no competing interests.

## **Ethics approval**

Ethical permission was obtained from the Regional Ethical Board of Linköping University, Sweden (No 2014/150-31).

## **Contributors**

KS, MU, ME, ML and LN designed and conducted the study. KS, MU and LN undertook the initial interpretation of the data, which was followed by discussions between all the authors.

All authors drafted the manuscript and were part of the revision process. All authors agreed to the final version of the manuscript before submission.

## **Data sharing statement**

No additional data are available.

## REFERENCES

1. Soop M, Fryksmark U, Köster M, et al. The incidence of adverse events in Swedish hospitals: a retrospective medical record review study. *Int J Qual Health Care* 2009;21:285–91.
2. von Plessen C, Kodal AM, Anhoj J. Experiences with global trigger tool reviews in five Danish hospitals: an implementation study. *BMJ Open*;2:1–8.
3. Resar RK, Rozich JD, Simmonds T, et al. A trigger tool to identify adverse events in the intensive care unit. *Jt Comm J Qual Patient Saf* 2006;32:585–90.
4. Kaafarani HM, Rosen AK, Nebeker JR, et al. Development of trigger tools for surveillance of adverse events in ambulatory surgery. *Qual Saf Health Care* 2010;19:425–9.
5. Unbeck M, Lindemalm S, Nydert P, et al. Validation of triggers and development of a pediatric trigger tool to identify adverse events. *BMC Health Serv Res* 2014;14:655.
6. Nilsson L, Risberg MB, Montgomery A, et al. Preventable adverse events in surgical care in Sweden: a nationwide review of patient notes. *Medicine (Baltimore)* 2016;95:e3047.
7. Mattsson TO, Knudsen JL, Lauritsen J, et al. Assessment of the global trigger tool to measure, monitor and evaluate patient safety in cancer patients: reliability concerns are raised. *BMJ Qual Saf* 2013;22:571–9.
8. Sears N, Baker GR, Barnsley J, et al. The incidence of adverse events among home care patients. *Int J Qual Health Care* 2013;25:16–28.

- 1  
2 9. Blais R, Sears NA, Doran D, et al. Assessing adverse events among home care clients in  
3  
4 three Canadian provinces using chart review. *BMJ Qual Saf* 2013;22:989–97.  
5  
6
- 7 10. Doran DM, Hirdes JP, Blais R, et al. The nature of safety problems among Canadian  
8  
9 homecare clients: evidence from the RAI-HC reporting system. *J Nurs Manage*  
10  
11 2009;17:165–74.  
12
- 13 11. Doran DM, Hirdes JP, Blais R, et al. Adverse events among Ontario home care clients  
14  
15 associated with emergency room visit or hospitalization: a retrospective cohort study.  
16  
17 *BMC Health Serv Res* 2013;13:227.  
18
- 19 12. Madigan E. A description of adverse events in home healthcare. *Home Healthc Nurse*  
20  
21 2007;25:191–7.  
22  
23
- 24 13. Classen DC, Resar R, Griffin F, et al. Global Trigger Tool’ shows that adverse events in  
25  
26 hospitals may be ten times greater than previously measured. *Health Affairs*  
27  
28 2011;30:581–9.  
29  
30
- 31 14. Griffin F, Resar R. IHI Global Trigger Tool for Measuring Adverse Events. 2nd ed.  
32  
33 Cambridge, MA: Institute for Healthcare Improvement; 2009.  
34  
35
- 36 15. Lindblad M, Schildmeijer K, Nilsson L, et al. Development and validation of a trigger tool  
37  
38 to identify adverse events and no-harm incidents that affect patients admitted to home  
39  
40 healthcare. *BMJ Qual and Saf*. Accepted 25 Aug 2017.  
41  
42  
43
- 44 16. Anell A, Glenngård AH, Merkur S. Sweden: health system review. *Health Syst Transit*  
45  
46 2012;14:1–159.  
47  
48
- 49 17. SFS 2010:659. Patientsäkerhetslagen [Patient Safety Act]. 2010. Stockholm: Riksdagen.  
50  
51 [https://www.riksdagen.se/sv/dokument-lagar/dokument/svensk-  
54  
55 forfattningssamling/patientsakerhetslag-2010659\\_sfs-2010-659](https://www.riksdagen.se/sv/dokument-lagar/dokument/svensk-<br/>52<br/>53 forfattningssamling/patientsakerhetslag-2010659_sfs-2010-659) (accessed Mar 20  
56  
57 2017).  
58  
59

- 1  
2  
3  
4  
5  
6  
7  
8  
9  
10  
11  
12  
13  
14  
15  
16  
17  
18  
19  
20  
21  
22  
23  
24  
25  
26  
27  
28  
29  
30  
31  
32  
33  
34  
35  
36  
37  
38  
39  
40  
41  
42  
43  
44  
45  
46  
47  
48  
49  
50  
51  
52  
53  
54  
55  
56  
57  
58  
59  
60
18. NCC MERP; <http://www.nccmerp.org/sites/default/files/indexBW2001-06-12.pdf>  
(accessed Sept 26 2017).
19. Brennan TA, Leape LL, Laird NM, et al. Incidence of adverse events and negligence in hospitalized patients. Results of the Harvard Medical Practice Study I. *N Engl J Med* 1991;324:370–6.
20. Kennerly DA, Saldana M, Kudyakov R, et al. Description and evaluation of adaption to the Global Trigger Tool to enhance value to adverse event reduction efforts. *J Patient Saf* 2013;9:87–95.
21. Johnson K. Adverse events among Winnipeg Home Care clients. *Healthc Q* 2006;9 Spec No:127–34.
22. Tisdale MJ. Cachexia in cancer patients. *Nat Rev Cancer* 2002;2:862–71.
23. Alibhai SMH, Greenwood C, Payette H. An approach to the management of unintentional weight loss in elderly people. *CMAJ* 2005;172:773–80.
24. Deilkås ET, Bukholm G, Lindstrom JC, et al. Monitoring adverse events in Norwegian hospitals from 2010 to 2013. *BMJ Open* 2015;5:e008576.
25. Unbeck M, Muren O, Lillkrona U. Identification of adverse events at an orthopedics department in Sweden. *Acta Orthop* 2008;79:396–403.
26. Unbeck M, Dalen N, Muren O, Lillkrona U, Härenstam KP. Healthcare processes must be improved to reduce the occurrence of orthopaedic adverse events. *Scand J Caring Sci* 2010;24(4):671–7. doi: 10.1111/j.1471-6712.2009.00760.x.
27. Adler L, Moore J, Federico F. IHI Skilled Nursing Facility Trigger Tool for Measuring Adverse Events. Cambridge, MA: Institute for Healthcare Improvement; 2015.  
<http://www.ihl.org/resources/Pages/Tools/SkilledNursingFacilityTriggerTool.aspx>  
(accessed Dec 30 2016).



1  
2  
3  
4  
5  
6  
7  
8  
9  
10  
11  
12  
13  
14  
15  
16  
17  
18  
19  
20  
21  
22  
23  
24  
25  
26  
27  
28  
29  
30  
31  
32  
33  
34  
35  
36  
37  
38  
39  
40  
41  
42  
43  
44  
45  
46  
47  
48  
49  
50  
51  
52  
53  
54  
55  
56  
57  
58  
59  
60

28. Hibbert PD, Molloy CJ, Hooper TD, et al. The application of the Global Trigger Tool: a systematic review. *Int J Qual Health Care* 2016;28:640–9.

For peer review only

## STROBE Statement

|                              | Page No | Recommendation                                                                                                                                                                                                                                                                                                                                                                                                                                                                                                                                                                                                                                                                                   |
|------------------------------|---------|--------------------------------------------------------------------------------------------------------------------------------------------------------------------------------------------------------------------------------------------------------------------------------------------------------------------------------------------------------------------------------------------------------------------------------------------------------------------------------------------------------------------------------------------------------------------------------------------------------------------------------------------------------------------------------------------------|
| <b>Title and abstract</b>    | 1-2     | (a) Indicate the study's design with a commonly used term in the title or the abstract<br>(b) Provide in the abstract an informative and balanced summary of what was done and what was found                                                                                                                                                                                                                                                                                                                                                                                                                                                                                                    |
| <b>Introduction</b>          |         |                                                                                                                                                                                                                                                                                                                                                                                                                                                                                                                                                                                                                                                                                                  |
| Background/rationale         | 4       | Explain the scientific background and rationale for the investigation being reported                                                                                                                                                                                                                                                                                                                                                                                                                                                                                                                                                                                                             |
| Objectives                   | 5       | State specific objectives, including any prespecified hypotheses                                                                                                                                                                                                                                                                                                                                                                                                                                                                                                                                                                                                                                 |
| <b>Methods</b>               |         |                                                                                                                                                                                                                                                                                                                                                                                                                                                                                                                                                                                                                                                                                                  |
| Study design                 | 5       | Present key elements of study design early in the paper                                                                                                                                                                                                                                                                                                                                                                                                                                                                                                                                                                                                                                          |
| Setting                      | 5       | Describe the setting, locations, and relevant dates, including periods of recruitment, exposure, follow-up, and data collection                                                                                                                                                                                                                                                                                                                                                                                                                                                                                                                                                                  |
| Participants                 | 6-7     | (a) <i>Cohort study</i> —Give the eligibility criteria, and the sources and methods of selection of participants. Describe methods of follow-up<br><i>Case-control study</i> —Give the eligibility criteria, and the sources and methods of case ascertainment and control selection. Give the rationale for the choice of cases and controls<br><i>Cross-sectional study</i> —Give the eligibility criteria, and the sources and methods of selection of participants<br>(b) <i>Cohort study</i> —For matched studies, give matching criteria and number of exposed and unexposed<br><i>Case-control study</i> —For matched studies, give matching criteria and the number of controls per case |
| Variables                    | 8-10    | Clearly define all outcomes, exposures, predictors, potential confounders, and effect modifiers. Give diagnostic criteria, if applicable                                                                                                                                                                                                                                                                                                                                                                                                                                                                                                                                                         |
| Data sources/<br>measurement | 6       | For each variable of interest, give sources of data and details of methods of assessment (measurement). Describe comparability of assessment methods if there is more than one group                                                                                                                                                                                                                                                                                                                                                                                                                                                                                                             |
| Bias                         |         | Describe any efforts to address potential sources of bias                                                                                                                                                                                                                                                                                                                                                                                                                                                                                                                                                                                                                                        |
| Study size                   | 6       | Explain how the study size was arrived at                                                                                                                                                                                                                                                                                                                                                                                                                                                                                                                                                                                                                                                        |
| Quantitative variables       | 10      | Explain how quantitative variables were handled in the analyses. If applicable, describe which groupings were chosen and why                                                                                                                                                                                                                                                                                                                                                                                                                                                                                                                                                                     |
| Statistical methods          | 10      | (a) Describe all statistical methods, including those used to control for confounding<br>(b) Describe any methods used to examine subgroups and interactions<br>(c) Explain how missing data were addressed<br>(d) <i>Cohort study</i> —If applicable, explain how loss to follow-up was addressed<br><i>Case-control study</i> —If applicable, explain how matching of cases and controls was addressed<br><i>Cross-sectional study</i> —If applicable, describe analytical methods taking account of sampling strategy<br>(e) Describe any sensitivity analyses                                                                                                                                |

Continued on next page

**Results**

|                  |       |                                                                                                                                                                                                                                                                                                                                                                                                               |
|------------------|-------|---------------------------------------------------------------------------------------------------------------------------------------------------------------------------------------------------------------------------------------------------------------------------------------------------------------------------------------------------------------------------------------------------------------|
| Participants     | 11    | (a) Report numbers of individuals at each stage of study—eg numbers potentially eligible, examined for eligibility, confirmed eligible, included in the study, completing follow-up, and analysed<br>(b) Give reasons for non-participation at each stage<br>(c) Consider use of a flow diagram                                                                                                               |
| Descriptive data | 11    | (a) Give characteristics of study participants (eg demographic, clinical, social) and information on exposures and potential confounders<br>(b) Indicate number of participants with missing data for each variable of interest<br>(c) <i>Cohort study</i> —Summarise follow-up time (eg, average and total amount)                                                                                           |
| Outcome data     | 12    | <i>Cohort study</i> —Report numbers of outcome events or summary measures over time<br><i>Case-control study</i> —Report numbers in each exposure category, or summary measures of exposure<br><i>Cross-sectional study</i> —Report numbers of outcome events or summary measures                                                                                                                             |
| Main results     | 12-15 | (a) Give unadjusted estimates and, if applicable, confounder-adjusted estimates and their precision (eg, 95% confidence interval). Make clear which confounders were adjusted for and why they were included<br>(b) Report category boundaries when continuous variables were categorized<br>(c) If relevant, consider translating estimates of relative risk into absolute risk for a meaningful time period |
| Other analyses   |       | Report other analyses done—eg analyses of subgroups and interactions, and sensitivity analyses                                                                                                                                                                                                                                                                                                                |

**Discussion**

|                  |       |                                                                                                                                                                            |
|------------------|-------|----------------------------------------------------------------------------------------------------------------------------------------------------------------------------|
| Key results      | 16-19 | Summarise key results with reference to study objectives                                                                                                                   |
| Limitations      | 20    | Discuss limitations of the study, taking into account sources of potential bias or imprecision. Discuss both direction and magnitude of any potential bias                 |
| Interpretation   | 20    | Give a cautious overall interpretation of results considering objectives, limitations, multiplicity of analyses, results from similar studies, and other relevant evidence |
| Generalisability | 20    | Discuss the generalisability (external validity) of the study results                                                                                                      |

**Other information**

|         |    |                                                                                                                                                               |
|---------|----|---------------------------------------------------------------------------------------------------------------------------------------------------------------|
| Funding | 21 | Give the source of funding and the role of the funders for the present study and, if applicable, for the original study on which the present article is based |
|---------|----|---------------------------------------------------------------------------------------------------------------------------------------------------------------|
